# Supplementary material for: Differentiations in Gene Content and Expression Response to Virulence Induction Between Two Agrobacterium Strains
Source: Front Microbiol. 2019 Jul 9;10:1554. doi: 10.3389/fmicb.2019.01554 (PMC6629968; doi:10.3389/fmicb.2019.01554)
Supplement: TABLE S3 — Lists of differentially expressed genes. Four separate sheets are included for listing the genes by genome or by the directionality of differential expression. The cluster id for each gene refers to the results of homologous gene cluster identification; genes sharing the same cluster id are considered as homologs. [file Table_3.XLSX]

## Sheet: C58
Cluster	Locus_tag	Contig	Start	End	Length	Strand	Gene	Product	RPKM_Control	RPKM_Induced	Probability	RPKM_Ratio	KEGG	COG	COG_Category	COG_Description
986	Atu0946	AE007869	935237	936337	1101	-1	NA	dehydrogenase	6.93566	52.8178	1	7.6154	NA	NA	?	NA
1756	Atu1865	AE007869	1845156	1845392	237	-1	NA	hypothetical protein	111.947	345.912	1	3.08997	NA	NA	?	NA
2607	Atu2782	AE007869	2787259	2787849	591	-1	NA	acetyltransferase	104.948	219.318	1	2.08978	NA	NA	?	NA
2608	Atu2783	AE007869	2787846	2788478	633	-1	NA	acetyltransferase	79.0877	183.8	1	2.32401	NA	NA	?	NA
40	Atu3578	AE007870	632366	633913	1548	-1	glpD	glycerol-3-phosphate dehydrogenase	14.6721	41.649	0.993706	2.83866	K00111	COG0578	C	Glycerol-3-phosphate dehydrogenase
4052	Atu4728	AE007870	1891371	1893173	1803	1	exsA	ABC transporter, nucleotide binding/ATPase protein	31.6934	126.877	1	4.00326	K06147	COG1132;COG2274;COG5265	OV	ABC-type multidrug transport system, ATPase and permease component;ABC-type bacteriocin/lantibiotic exporters, contain an N-terminal double-glycine peptidase domain;ABC-type transport system involved in Fe-S cluster assembly, permease and ATPase components
17	Atu5381	AE007872	371016	374174	3159	-1	NA	AcrB/AcrD/AcrF family protein	23.79	65.3554	1	2.74718	NA	NA	?	NA
6360	Atu5382	AE007872	374200	375354	1155	-1	NA	HlyD family secretion protein	21.6116	71.3313	1	3.3006	NA	NA	?	NA
6361	Atu5383	AE007872	375414	376013	600	-1	NA	transcriptional regulator, TetR family	19.9143	67.2123	1	3.37508	NA	NA	?	NA
4118	Atu6044	AE007871	53578	54690	1113	1	repB	replication protein	343.714	775.736	1	2.25692	K03497	COG1475	D	Chromosome segregation protein Spo0J, contains ParB-like nuclease domain
6084	Atu6098	AE007871	118471	118932	462	-1	NA	transcriptional regulator, HTH family	25.7296	89.0077	1	3.45936	NA	NA	?	NA
4229	Atu6109	AE007871	130449	131048	600	1	NA	conserved hypothetical protein	1.13704	3.41524	0.99667	3.00364	NA	NA	?	NA
4156	Atu6120	AE007871	139472	139750	279	-1	hupT	HNS-type DNA binding protein	192.05	390.72	1	2.03448	K03530	COG0776	L	Bacterial nucleoid DNA-binding protein
6090	Atu6121	AE007871	139890	140147	258	-1	ych	conserved hypothetical protein	42.552	1094.91	1	25.7312	NA	NA	?	NA
6094	Atu6137	AE007871	156936	157232	297	-1	NA	hypothetical protein	4.81812	42.0107	1	8.71931	NA	NA	?	NA
6095	Atu6138	AE007871	157464	158240	777	1	accR	Repressor of the acc and arc operons	15.8128	48.052	1	3.0388	NA	NA	?	NA
6103	Atu6149	AE007871	167545	167880	336	1	NA	hypothetical protein	64.5773	1469.08	1	22.7492	NA	NA	?	NA
6104	Atu6150	AE007871	167883	169142	1260	1	virH1	P-450 monooxygenase	172.049	13989.9	1	81.3134	K21033	NA	?	NA
4219	Atu6151	AE007871	169219	170394	1176	1	virH2	P-450 monoxygenase	78.6312	6540.44	1	83.1787	K21034	NA	?	NA
107	Atu6152	AE007871	170670	171593	924	1	tnp	transposase	50.4431	2435.56	1	48.2833	NA	NA	?	NA
6106	Atu6154	AE007871	172489	173427	939	1	virF	exported virulence protein	140.753	1485.24	1	10.5521	NA	NA	?	NA
6107	Atu6155	AE007871	173878	174306	429	1	NA	conserved hypothetical protein	14.5024	5948.51	1	410.175	NA	NA	?	NA
4218	Atu6156	AE007871	174328	174762	435	1	virK	virA/G regulated gene	44.1259	4204.19	1	95.2771	NA	NA	?	NA
6108	Atu6157	AE007871	174806	175120	315	1	NA	conserved hypothetical protein	51.4128	1849.69	1	35.9772	NA	NA	?	NA
6111	Atu6160	AE007871	176065	176244	180	1	ynh	conserved hypothetical protein	14.2516	54.0806	1	3.7947	NA	NA	?	NA
6113	Atu6162	AE007871	177407	178117	711	-1	NA	conserved hypothetical protein	50.3062	546.648	1	10.8664	NA	NA	?	NA
6115	Atu6164	AE007871	179262	179993	732	-1	tzs	trans-zeatin secretion protein	92.8107	19920.2	1	214.633	K22871	NA	?	NA
6116	Atu6165	AE007871	180279	180470	192	1	NA	hypothetical protein	20.8142	134.456	1	6.45982	NA	NA	?	NA
4217	Atu6166	AE007871	180831	183332	2502	1	virA	two component sensor kinase	65.5025	525.527	1	8.02301	NA	NA	?	NA
4121	Atu6167	AE007871	183877	184614	738	1	virB1	component of type IV secretion system	10.5383	13018.7	1	1235.37	K03194	NA	?	NA
4122	Atu6168	AE007871	184614	184979	366	1	virB2	component of type IV secretion system, pilin subunit	19.3838	19737.2	1	1018.23	K03197	COG3838	U	Type IV secretory pathway, VirB2 components (pilins)
4123	Atu6169	AE007871	184979	185305	327	1	virB3	component of type IV secretion system	26.2883	14415.3	1	548.354	K03198	COG3702	U	Type IV secretory pathway, VirB3 components
105	Atu6170	AE007871	185305	187674	2370	1	virB4	component of type IV secretion system	19.6914	5384.11	1	273.424	K03199	COG3451	U	Type IV secretory pathway, VirB4 component
4124	Atu6171	AE007871	187691	188353	663	1	virB5	component of type IV secretion system	21.8229	3934.21	1	180.279	K03200	COG3701	U	Type IV secretory pathway, TrbF components
4125	Atu6172	AE007871	188454	189341	888	1	virB6	component of type IV secretion system	19.7702	1921.19	1	97.1757	K03201	COG3704	U	Type IV secretory pathway, VirB6 components
4126	Atu6173	AE007871	189377	189544	168	1	virB7	component of type IV secretion system	22.6374	1471.42	1	64.9997	K03202	NA	?	NA
4127	Atu6174	AE007871	189531	190244	714	1	virB8	component of type IV secretion system	18.8112	948.699	1	50.4327	K03203	COG3736	U	Type IV secretory pathway, component VirB8
4128	Atu6175	AE007871	190241	191122	882	1	virB9	component of type IV secretion system	32.0471	813.022	1	25.3696	K03204	COG3504	U	Type IV secretory pathway, VirB9 components
4129	Atu6176	AE007871	191119	192252	1134	1	virB10	component of type IV secretion system	193.59	1359.7	1	7.02359	K03195	COG2948	U	Type IV secretory pathway, VirB10 components
4130	Atu6177	AE007871	192293	193327	1035	1	virB11	component of type IV secretion system	83.046	573.362	1	6.90416	K03196	COG0630	U	Type IV secretory pathway ATPase VirB11/Archaellum biosynthesis ATPase
4133	Atu6179	AE007871	194449	195057	609	-1	virC2	virA/G regulated protein	19.4495	595.161	1	30.6003	NA	NA	?	NA
4134	Atu6180	AE007871	195060	195755	696	-1	virC1	virA/G regulated protein	16.9134	2352.77	1	139.107	NA	NA	?	NA
4135	Atu6181	AE007871	196026	196469	444	1	virD1	virA/G regulated topoisomerase	33.962	4843.71	1	142.621	K18433	NA	?	NA
4136	Atu6182	AE007871	196503	197846	1344	1	virD2	endonuclease	15.3233	1896.84	1	123.788	K18434	COG3843	U	Type IV secretory pathway, VirD2 components (relaxase)
6117	Atu6183	AE007871	197861	199882	2022	1	virD3	virA/G regulated protein	45.3136	1682.11	1	37.1216	NA	NA	?	NA
4137	Atu6184	AE007871	199956	201962	2007	1	virD4	virA/G regulated protein	144.62	548.049	1	3.78957	K03205	COG3505	U	Type IV secretory pathway, VirD4 component, TraG/TraD family ATPase
4138	Atu6185	AE007871	202074	204596	2523	1	virD5	virA/G regulated protein	68.8485	196.448	1	2.85334	NA	NA	?	NA
6118	Atu6186	AE007871	204666	205232	567	1	virE3	virA/G regulated protein	14.8594	32.2866	0.992631	2.17281	NA	NA	?	NA
6119	Atu6188	AE007871	205684	205935	252	1	virE0	virA/G regulated protein	247.899	24301.1	1	98.0283	NA	NA	?	NA
4139	Atu6189	AE007871	206051	206242	192	1	virE1	protein secretion chaperone	245.363	28282.6	1	115.268	NA	NA	?	NA
4140	Atu6190	AE007871	206256	207926	1671	1	virE2	exported virulence protein	151.403	14943.7	1	98.7017	NA	NA	?	NA
4141	Atu6191	AE007871	207993	210047	2055	1	virE3	virA/G regulated protein	123.159	7206.61	1	58.5148	NA	NA	?	NA
155	Atu0035	AE007869	37589	39199	1611	1	pckA	phosphoenolpyruvate carboxykinase	1474.77	406.714	1	0.275782	K01610	COG1866	C	Phosphoenolpyruvate carboxykinase, ATP-dependent
681	Atu0607	AE007869	593283	594572	1290	-1	aceA	isocitrate lyase	67.3556	29.9549	0.998274	0.444728	K01637	COG2224	C	Isocitrate lyase
936	Atu0886	AE007869	879344	879910	567	-1	NA	conserved hypothetical protein	382.234	130.199	1	0.340627	NA	NA	?	NA
937	Atu0887	AE007869	879932	880420	489	-1	NA	acetyltransferase	613.74	272.05	1	0.443266	NA	NA	?	NA
1077	Atu1049	AE007869	1042991	1043674	684	-1	NA	conserved hypothetical protein	713.63	190.77	0.996203	0.267323	K09815	COG0803	P	ABC-type Zn uptake system ZnuABC, Zn-binding component ZnuA
1543	Atu1610	AE007869	1591996	1593372	1377	-1	dhs	2-dehydro-3-deoxyphosphoheptonate aldolase	797.881	371.126	1	0.46514	K01626	COG0722	E	3-deoxy-D-arabino-heptulosonate 7-phosphate (DAHP) synthase
2120	Atu2287	AE007869	2258667	2260907	2241	1	NA	outer membrane heme receptor	33.8837	16.594	0.995863	0.489734	K16087	COG1629	P	Outer membrane receptor proteins, mostly Fe transport
2198	Atu2382	AE007869	2353547	2353837	291	-1	NA	conserved hypothetical protein	1179.53	569.057	0.999173	0.482444	NA	NA	?	NA
5665	Atu2472	AE007869	2440930	2441274	345	-1	NA	hypothetical protein	117.962	57.8375	0.997503	0.490306	NA	NA	?	NA
2767	Atu3181	AE007870	191044	192246	1203	1	NA	conserved hypothetical protein	211.187	67.5306	0.994391	0.319766	NA	NA	?	NA
2768	Atu3182	AE007870	192325	192762	438	-1	NA	conserved hypothetical protein	64.8213	25.0336	0.994408	0.386194	NA	NA	?	NA
2769	Atu3183	AE007870	192860	193129	270	-1	NA	hypothetical protein	213.476	60.6496	0.996083	0.284105	NA	NA	?	NA
2770	Atu3184	AE007870	193126	194169	1044	-1	NA	conserved hypothetical protein	177.71	49.5567	0.996088	0.278863	NA	NA	?	NA
5768	Atu3666	AE007870	715046	715504	459	1	NA	conserved hypothetical protein	757.318	326.857	0.999939	0.431598	K13771	COG1959	K	DNA-binding transcriptional regulator, IscR family
5769	Atu3667	AE007870	715559	716026	468	1	panD	aspartate 1-decarboxylase	629.152	263.688	1	0.419117	K01579	COG0853	H	Aspartate 1-decarboxylase
3462	Atu3669	AE007870	716694	718055	1362	-1	NA	siderophore biosynthesis protein	123.451	53.3642	0.999799	0.432271	NA	NA	?	NA
20	Atu3670	AE007870	718087	721473	3387	-1	NA	siderophore biosynthesis protein	291.13	125.384	0.999989	0.43068	NA	NA	?	NA
3461	Atu3671	AE007870	721484	722551	1068	-1	NA	siderophore biosynthesis protein	388.609	166.509	0.999396	0.428473	NA	NA	?	NA
46	Atu3672	AE007870	722591	727153	4563	-1	NA	polyketide synthase, siderophore biosynthesis protein	393.49	170.007	0.999997	0.432049	NA	NA	?	NA
3460	Atu3673	AE007870	727195	729447	2253	-1	NA	siderophore biosynthesis protein	593.436	258.07	0.999998	0.434874	NA	NA	?	NA
3459	Atu3675	AE007870	729769	734331	4563	1	NA	peptide synthetase, siderophore biosynthesis protein	486.352	206.178	0.999992	0.423926	NA	NA	?	NA
3458	Atu3676	AE007870	734328	735224	897	1	NA	putative siderophore biosynthesis protein	626.905	268.492	0.999996	0.428282	NA	NA	?	NA
3457	Atu3677	AE007870	735221	736696	1476	1	NA	polyketide synthase, siderophore biosynthesis protein	512	226.034	0.999973	0.441472	NA	NA	?	NA
3456	Atu3678	AE007870	736711	736950	240	1	NA	putative siderophore biosynthesis protein	1793	785.441	1	0.43806	K05375	COG3251	S	Uncharacterized conserved protein YbdZ, MbtH family
3455	Atu3679	AE007870	736961	737479	519	1	NA	putative siderophore biosynthesis protein	762.027	328.926	1	0.431646	NA	NA	?	NA
3454	Atu3680	AE007870	737476	738039	564	1	NA	putative siderophore biosynthesis protein	266.114	109.605	0.999243	0.411874	NA	NA	?	NA
46	Atu3681	AE007870	738077	742510	4434	1	NA	polyketide synthetase, siderophore biosynthesis protein	225.487	91.367	0.999984	0.405199	NA	NA	?	NA
20	Atu3682	AE007870	742507	749706	7200	1	NA	non-ribosomal peptide synthetase, siderophore biosynthesis protein	218.5	91.4874	0.999098	0.418707	NA	NA	?	NA
20	Atu3683	AE007870	749718	757409	7692	1	NA	peptide synthetase, siderophore biosynthesis protein	165.808	72.3708	0.99924	0.436473	NA	NA	?	NA
3453	Atu3684	AE007870	757414	759081	1668	1	NA	siderophore biosynthesis protein	111.046	49.1242	0.999814	0.442377	NA	NA	?	NA
3452	Atu3685	AE007870	759096	759842	747	1	NA	Thioesterase, putative siderophore biosynthesis protein	130.672	57.7272	0.999558	0.441773	NA	NA	?	NA
3450	Atu3687	AE007870	760897	763335	2439	1	NA	TonB-dependent receptor	416.333	205.61	0.999996	0.493858	NA	NA	?	NA
3447	Atu3690	AE007870	765352	766326	975	1	fecD	ABC transporter, membrane spanning protein (iron (III) dicitrate)	43.8791	21.3156	0.998255	0.48578	K02015	COG0609	P	ABC-type Fe3+-siderophore transport system, permease component
5810	Atu3920	AE007870	1022278	1022538	261	1	NA	hypothetical protein	1.41809	0.708548	0.993283	0.499651	NA	NA	?	NA
3834	Atu4447	AE007870	1592333	1593646	1314	1	NA	ABC transporter, substrate binding protein (sorbitol)	114.189	50.9478	0.999002	0.446171	K10227	COG1653	G	ABC-type glycerol-3-phosphate transport system, periplasmic component
6313	Atu5300	AE007872	294094	294510	417	-1	NA	hypothetical protein	3.26996	1.31923	0.998148	0.403439	NA	NA	?	NA

## Sheet: 1D1609
Cluster	Locus_tag	Contig	Start	End	Length	Strand	Gene	Product	RPKM_Control	RPKM_Induced	Probability	RPKM_Ratio	KEGG	COG	COG_Category	COG_Description
273	At1D1609_01540	CP026924	177041	177946	906	-1	phnD	phosphonate transport system substrate-binding protein	2.32642	6.68672	1	2.87425	K02044	COG3221	P	ABC-type phosphate/phosphonate transport system, periplasmic component
274	At1D1609_01550	CP026924	178032	178892	861	-1	phnC	phosphonate transport system ATP-binding protein	0.540973	3.70724	0.999488	6.85291	K02041	COG3638	P	ABC-type phosphate/phosphonate transport system, ATPase component
405	At1D1609_03450	CP026924	356761	358059	1299	1	ugpB	sn-glycerol 3-phosphate transport system substrate-binding protein	2.6667	13.8789	1	5.20452	K05813	COG1653	G	ABC-type glycerol-3-phosphate transport system, periplasmic component
1486	At1D1609_15720	CP026924	1577719	1578582	864	-1	fixP	cytochrome c oxidase, FixP chain	8.58309	18.7019	0.990957	2.17892	K00406	COG2010	C	Cytochrome c, mono- and diheme variants
1487	At1D1609_15730	CP026924	1578586	1578738	153	-1	fixQ	cytochrome c oxidase, FixQ chain	7.14768	20.3642	0.994268	2.84906	K00407	NA	?	NA
1488	At1D1609_15740	CP026924	1578752	1579483	732	-1	fixO	cytochrome c oxidase, FixO chain	9.55969	20.1127	0.992047	2.10391	K00405	COG2993	C	Cbb3-type cytochrome oxidase, cytochrome c subunit
4644	At1D1609_24190	CP026924	2436050	2436277	228	-1	NA	hypothetical protein	86.0659	289.469	1	3.36334	NA	NA	?	NA
3242	At1D1609_37320	CP026925	817472	819349	1878	1	NA	ABC transporter permease	57.4266	125.919	1	2.19269	NA	NA	?	NA
3243	At1D1609_37330	CP026925	819416	820426	1011	1	NA	ABC transporter substrate-binding protein	35.9899	83.2548	1	2.31329	NA	NA	?	NA
3247	At1D1609_37370	CP026925	823359	824984	1626	1	NA	acyl-CoA synthetase	8.99014	18.4091	0.996648	2.0477	NA	NA	?	NA
3248	At1D1609_37380	CP026925	825016	825783	768	1	fabG	3-oxoacyl-[acyl-carrier-protein] reductase	10.224	20.6748	0.996742	2.02218	NA	NA	?	NA
3316	At1D1609_38150	CP026925	909502	910347	846	-1	NA	hydrolase	16.6615	36.8289	0.999999	2.21042	NA	NA	?	NA
3317	At1D1609_38160	CP026925	910359	910961	603	-1	NA	peptide synthetase	20.4948	45.5128	0.998627	2.2207	NA	NA	?	NA
3521	At1D1609_41520	CP026925	1284686	1285606	921	-1	NA	gluconolactonase	35.5522	94.9751	1	2.67142	K01053	COG3386	G	Sugar lactone lactonase YvrE
3522	At1D1609_41530	CP026925	1285642	1286589	948	-1	rbsC	ribose transport system permease protein	16.304	47.2634	1	2.89888	K10440	COG1172	G	Ribose/xylose/arabinose/galactoside ABC-type transport system, permease component
3523	At1D1609_41540	CP026925	1286586	1287527	942	-1	rbsC	ribose transport system permease protein	15.7627	40.3616	1	2.56058	K10440	COG1172	G	Ribose/xylose/arabinose/galactoside ABC-type transport system, permease component
3524	At1D1609_41550	CP026925	1287524	1288987	1464	-1	rbsA	ribose transport system ATP-binding protein	27.748	78.4113	1	2.82583	K10441	COG1129	G	ABC-type sugar transport system, ATPase component
3525	At1D1609_41560	CP026925	1289086	1290102	1017	-1	rbsB	ribose transport system substrate-binding protein	200.686	526.387	1	2.62294	K10439	COG1879	G	ABC-type sugar transport system, periplasmic component, contains N-terminal xre family HTH domain
3801	At1D1609_45290	CP026925	1690198	1690485	288	1	napD	periplasmic nitrate reductase NapD	154.112	313.539	0.991386	2.03449	K02570	COG3062	O	Cytoplasmic chaperone NapD for the signal peptide of periplasmic nitrate reductase NapAB
3803	At1D1609_45310	CP026925	1692961	1693425	465	1	napB	cytochrome c-type protein NapB	172.014	369.623	0.994271	2.14879	K02568	COG3043	CP	Nitrate reductase cytochrome c-type subunit
5054	At1D1609_49800	CP026925	2203407	2204213	807	-1	NA	hypothetical protein	9.24793	101.7	1	10.997	NA	NA	?	NA
7	At1D1609_49820	CP026925	2205132	2208272	3141	-1	acrB	multidrug efflux pump	5.94734	13.2973	0.999984	2.23584	K18138	COG0841	V	Multidrug efflux pump subunit AcrB
5056	At1D1609_49830	CP026925	2208276	2209430	1155	-1	NA	hemolysin D	1.9665	7.90597	1	4.02032	K03585	COG0845	MV	Multidrug efflux pump subunit AcrA (membrane-fusion protein)
4119	At1D1609_51000	CP026926	2665	3984	1320	1	repC	replication protein C	216.948	435.386	1	2.00686	K18996	NA	?	NA
4121	At1D1609_51060	CP026926	13045	13764	720	1	virB1	type IV secretion system lytic transglycosylase VirB1	13.7884	9799.99	1	710.743	K03194	NA	?	NA
4122	At1D1609_51070	CP026926	13779	14144	366	1	virB2	type IV secretion system protein VirB2	180.718	8320.21	1	46.0398	K03197	COG3838	U	Type IV secretory pathway, VirB2 components (pilins)
4123	At1D1609_51075	CP026926	14144	14470	327	1	virB3	type IV secretion system protein VirB3	41.495	7876.69	1	189.822	K03198	COG3702	U	Type IV secretory pathway, VirB3 components
105	At1D1609_51080	CP026926	14470	16839	2370	1	virB4	type IV secretion system protein VirB4	23.7666	2120.49	1	89.2212	K03199	COG3451	U	Type IV secretory pathway, VirB4 component
4124	At1D1609_51090	CP026926	16854	17516	663	1	virB5	type IV secretion system protein VirB5	78.1053	3865.6	1	49.4921	K03200	COG3701	U	Type IV secretory pathway, TrbF components
4125	At1D1609_51100	CP026926	17613	18500	888	1	virB6	type IV secretion system protein VirB6	36.627	1689.33	1	46.1225	K03201	COG3704	U	Type IV secretory pathway, VirB6 components
4126	At1D1609_51110	CP026926	18534	18701	168	1	virB7	type IV secretion system protein VirB7	95.8077	1671.57	1	17.4471	K03202	NA	?	NA
4127	At1D1609_51120	CP026926	18688	19401	714	1	virB8	type IV secretion system protein VirB8	42.536	895.873	1	21.0615	K03203	COG3736	U	Type IV secretory pathway, component VirB8
4128	At1D1609_51130	CP026926	19398	20279	882	1	virB9	type IV secretion system protein VirB9	53.2998	1000.44	1	18.77	K03204	COG3504	U	Type IV secretory pathway, VirB9 components
4129	At1D1609_51140	CP026926	20276	21409	1134	1	virB10	type IV secretion system protein VirB10	67.8482	887.554	1	13.0815	K03195	COG2948	U	Type IV secretory pathway, VirB10 components
4130	At1D1609_51150	CP026926	21449	22480	1032	1	virB11	type IV secretion system protein VirB11	60.9984	576.309	1	9.44793	K03196	COG0630	U	Type IV secretory pathway ATPase VirB11/Archaellum biosynthesis ATPase
4131	At1D1609_51160	CP026926	22690	23415	726	1	virG	two-component response regulator VirG	170.944	3107.17	1	18.1766	NA	NA	?	NA
5118	At1D1609_51170	CP026926	23474	23857	384	1	NA	hypothetical protein	106.852	1416.77	1	13.2593	NA	NA	?	NA
8	At1D1609_51180	CP026926	23913	24236	324	-1	NA	transposase	42.3673	86.2459	1	2.03567	NA	NA	?	NA
5121	At1D1609_51280	CP026926	32733	32924	192	-1	NA	hypothetical protein	72.5922	253.788	1	3.49607	NA	NA	?	NA
5122	At1D1609_51290	CP026926	32875	33267	393	-1	NA	transposase	34.4745	471.404	1	13.674	K07483	COG2963	X	Transposase and inactivated derivatives
4133	At1D1609_51300	CP026926	33393	34001	609	-1	virC2	crown gall tumor protein VirC2	25.8831	714.911	1	27.6207	NA	NA	?	NA
4134	At1D1609_51310	CP026926	34004	34699	696	-1	virC1	crown gall tumor protein VirC1	13.0771	668.817	1	51.1442	NA	NA	?	NA
4135	At1D1609_51320	CP026926	34968	35411	444	1	virD1	type IV secretion system T-DNA border endonuclease VirD1	22.856	8173.8	1	357.622	K18433	NA	?	NA
4136	At1D1609_51330	CP026926	35445	36719	1275	1	virD2	type IV secretion system T-DNA border endonuclease VirD2	48.7875	3620.04	1	74.2001	NA	NA	?	NA
5123	At1D1609_51340	CP026926	36739	37344	606	1	virD3	virA/G regulated protein	15.3872	1584.25	1	102.959	NA	NA	?	NA
4137	At1D1609_51350	CP026926	37373	39343	1971	1	virD4	type IV secretion system protein VirD4	84.6352	617.672	1	7.29805	K03205	COG3505	U	Type IV secretory pathway, VirD4 component, TraG/TraD family ATPase
4138	At1D1609_51360	CP026926	39435	41936	2502	1	virD5	virA/G regulated protein	78.7725	364.455	1	4.62668	NA	NA	?	NA
4139	At1D1609_51370	CP026926	42389	42586	198	1	virE1	type IV secretion system chaperone VirE1	224.911	19883.4	1	88.4057	NA	NA	?	NA
4140	At1D1609_51380	CP026926	42591	44192	1602	1	virE2	type IV secretion system single-stranded DNA binding protein VirE2	145.293	12653.6	1	87.0903	NA	NA	?	NA
4141	At1D1609_51390	CP026926	44258	46276	2019	1	virE3	virA/G regulated protein	234.502	8359.85	1	35.6493	NA	NA	?	NA
5124	At1D1609_51400	CP026926	46524	46718	195	1	NA	hypothetical protein	48.7832	2099.69	1	43.0413	NA	NA	?	NA
5125	At1D1609_51410	CP026926	46888	47196	309	1	NA	integration host factor beta subunit	105.808	720.612	1	6.81059	K05788	COG0776	L	Bacterial nucleoid DNA-binding protein
5126	At1D1609_51420	CP026926	47247	47612	366	1	NA	hypothetical protein	54.4745	355.844	1	6.5323	NA	NA	?	NA
5127	At1D1609_51430	CP026926	47626	47928	303	1	cspA	cold shock protein	69.3962	348.064	1	5.01561	K03704	COG1278	K	Cold shock protein, CspA family
4142	At1D1609_51440	CP026926	48251	48751	501	1	NA	amino acid transporter	40.3042	101.3	1	2.51339	NA	NA	?	NA
5129	At1D1609_51490	CP026926	51488	52096	609	1	NA	VirF	186.188	14947.9	1	80.2836	NA	NA	?	NA
5130	At1D1609_51500	CP026926	52789	53031	243	1	NA	hypothetical protein	23.3122	629.628	1	27.0086	NA	NA	?	NA
5131	At1D1609_51510	CP026926	53679	54311	633	1	gph	phosphoglycolate phosphatase	9.66602	1123.86	1	116.269	K01091	COG0546	C	Phosphoglycolate phosphatase, HAD superfamily
5132	At1D1609_51520	CP026926	54391	54603	213	1	NA	hypothetical protein	11.8953	615.589	1	51.7504	NA	NA	?	NA
5133	At1D1609_51530	CP026926	54977	55504	528	1	NA	VirH	22.7443	10704.6	1	470.653	NA	NA	?	NA
5136	At1D1609_51580	CP026926	59896	60021	126	-1	NA	hypothetical protein	2.1849	4.71523	0.990558	2.1581	NA	NA	?	NA
5143	At1D1609_51770	CP026926	87053	87154	102	-1	NA	hypothetical protein	17.2006	61.3211	0.999989	3.56505	NA	NA	?	NA
4156	At1D1609_51790	CP026926	87612	87890	279	-1	hupT	HNS-type DNA binding protein	127.603	997.106	1	7.81412	K03530	COG0776	L	Bacterial nucleoid DNA-binding protein
5160	At1D1609_52200	CP026926	126890	127708	819	-1	NA	hypothetical protein	16.6992	38.5161	1	2.30647	K10710	COG0524	G	Sugar or nucleoside kinase, ribokinase family
5161	At1D1609_52210	CP026926	127718	128740	1023	-1	frlB	fructoselysine 6-phosphate deglycase	20.6451	44.9533	1	2.17743	NA	NA	?	NA
5162	At1D1609_52230	CP026926	130228	130974	747	1	fabG	3-oxoacyl-[acyl-carrier-protein] reductase	28.4451	71.8147	1	2.52468	K00059	COG1028	IQR	NAD(P)-dependent dehydrogenase, short-chain alcohol dehydrogenase family
66	At1D1609_52250	CP026926	131181	132821	1641	1	edd	phosphogluconate dehydratase	15.739	37.0005	1	2.35088	K01690	COG0129	EG	Dihydroxyacid dehydratase/phosphogluconate dehydratase
110	At1D1609_52260	CP026926	132845	133909	1065	1	NA	aldo/keto reductase	20.1571	41.5452	1	2.06107	NA	NA	?	NA
5291	At1D1609_54470	CP026927	197636	198358	723	-1	NA	AcvB	198.539	3419.44	1	17.223	NA	NA	?	NA
4218	At1D1609_54500	CP026927	202741	203178	438	-1	virK	VirK	185.757	571.571	1	3.07698	NA	NA	?	NA
4219	At1D1609_54510	CP026927	203450	204625	1176	-1	virH2	P-450 monooxygenase	31.1657	1212.35	1	38.9	K21034	NA	?	NA
5295	At1D1609_54560	CP026927	207841	208194	354	-1	NA	transposase	8.7258	18.7683	0.999809	2.1509	NA	NA	?	NA
5296	At1D1609_54570	CP026927	208898	210763	1866	-1	NA	hypothetical protein	144.085	871.674	1	6.04973	NA	NA	?	NA
5297	At1D1609_54580	CP026927	210753	211097	345	-1	NA	hypothetical protein	192.649	2910.89	1	15.1098	NA	NA	?	NA
155	At1D1609_00340	CP026924	37337	38947	1611	1	pckA	phosphoenolpyruvate carboxykinase	1573.58	445.23	1	0.282941	K01610	COG1866	C	Phosphoenolpyruvate carboxykinase, ATP-dependent
262	At1D1609_01430	CP026924	166118	167332	1215	1	exbB	biopolymer transport protein	1089.53	495.965	1	0.455211	K03561	COG0811	U	Biopolymer transport protein ExbB/TolQ
263	At1D1609_01440	CP026924	167339	167815	477	1	exbD	biopolymer transport protein	798.729	352.027	1	0.440734	K03559	COG0848	U	Biopolymer transport protein ExbD
264	At1D1609_01450	CP026924	167812	168738	927	1	tonB	tonB protein	582.536	260.363	1	0.446948	K03832	COG0810	M	Periplasmic protein TonB, links inner and outer membranes
321	At1D1609_02050	CP026924	228301	228750	450	1	NA	hypothetical protein	237.46	98.0364	1	0.412854	K15977	COG2259	S	Uncharacterized membrane protein YphA, DoxX/SURF4 family
506	At1D1609_04480	CP026924	468157	469038	882	1	NA	AraC family transcriptional regulator	351.926	167.298	1	0.475378	NA	NA	?	NA
720	At1D1609_07020	CP026924	712520	712813	294	1	NA	hypothetical protein	4937.78	2086.22	1	0.422501	NA	NA	?	NA
737	At1D1609_07200	CP026924	730664	731707	1044	-1	NA	membrane protein	2536.35	250.295	1	0.098683	NA	NA	?	NA
986	At1D1609_09900	CP026924	997336	998436	1101	-1	NA	dehydrogenase	17.5689	8.11283	1	0.461772	NA	NA	?	NA
1077	At1D1609_10970	CP026924	1108607	1109293	687	-1	znuA	zinc transport system substrate-binding protein	89.7736	24.7724	0.99876	0.275943	K09815	COG0803	P	ABC-type Zn uptake system ZnuABC, Zn-binding component ZnuA
4440	At1D1609_12720	CP026924	1277367	1278479	1113	1	NA	iron ABC transporter substrate-binding protein	129.116	37.9019	1	0.293548	NA	NA	?	NA
4441	At1D1609_12730	CP026924	1278592	1279644	1053	1	NA	iron ABC transporter permease	18.8264	5.04279	1	0.267858	K02015	COG0609	P	ABC-type Fe3+-siderophore transport system, permease component
4442	At1D1609_12740	CP026924	1279641	1280462	822	1	NA	iron complex transport system ATP-binding protein	18.106	4.55783	1	0.251731	K02013	COG1120	HP	ABC-type cobalamin/Fe3+-siderophores transport system, ATPase component
4443	At1D1609_12750	CP026924	1280459	1280914	456	1	NA	pseudoazurin	31.5774	7.49285	1	0.237286	NA	NA	?	NA
4444	At1D1609_12760	CP026924	1280988	1281485	498	1	ftn	ferritin	90.3659	23.671	1	0.261946	K02217	COG1528	P	Ferritin
1474	At1D1609_15590	CP026924	1562261	1563253	993	1	znuA	zinc transport system substrate-binding protein	253.084	117.484	0.998213	0.46421	K09815	COG0803	P	ABC-type Zn uptake system ZnuABC, Zn-binding component ZnuA
4500	At1D1609_17480	CP026924	1779325	1779582	258	-1	NA	hypothetical protein	36.8538	14.8009	0.997709	0.401611	NA	NA	?	NA
4501	At1D1609_17490	CP026924	1779579	1780658	1080	-1	NA	hypothetical protein	27.6327	11.2517	0.996882	0.407188	NA	NA	?	NA
4504	At1D1609_17520	CP026924	1784017	1784385	369	-1	NA	hypothetical protein	71.3399	31.8856	0.997634	0.446953	NA	NA	?	NA
4513	At1D1609_17610	CP026924	1791622	1792080	459	-1	NA	hypothetical protein	56.9629	28.3322	0.995416	0.497379	NA	NA	?	NA
4514	At1D1609_17620	CP026924	1792153	1792587	435	-1	NA	hypothetical protein	103.135	49.5524	0.996917	0.480463	NA	NA	?	NA
4515	At1D1609_17630	CP026924	1792599	1793741	1143	-1	NA	hypothetical protein	90.7489	38.7611	0.997833	0.427124	NA	NA	?	NA
4516	At1D1609_17640	CP026924	1793768	1794250	483	-1	NA	hypothetical protein	33.7275	16.047	0.994052	0.475784	NA	NA	?	NA
4517	At1D1609_17650	CP026924	1794247	1794579	333	-1	NA	hypothetical protein	47.8665	22.5356	0.995096	0.4708	NA	NA	?	NA
4518	At1D1609_17660	CP026924	1794576	1795040	465	-1	NA	hypothetical protein	52.6984	24.5842	0.995477	0.466507	NA	NA	?	NA
4519	At1D1609_17670	CP026924	1795040	1795429	390	-1	NA	hypothetical protein	85.9704	39.6867	0.995237	0.461632	NA	NA	?	NA
4520	At1D1609_17680	CP026924	1795429	1795620	192	-1	NA	hypothetical protein	194.837	79.8626	0.998462	0.409894	NA	NA	?	NA
4521	At1D1609_17690	CP026924	1795677	1796138	462	-1	NA	hypothetical protein	376.177	156.072	0.998078	0.414889	NA	NA	?	NA
4522	At1D1609_17700	CP026924	1796150	1797118	969	-1	NA	hypothetical protein	321.156	129.226	0.997807	0.402379	NA	NA	?	NA
4523	At1D1609_17710	CP026924	1797122	1797601	480	-1	NA	hypothetical protein	324.161	125.762	0.998007	0.387963	NA	NA	?	NA
4524	At1D1609_17720	CP026924	1797614	1798765	1152	-1	NA	hypothetical protein	185.982	76.746	0.998325	0.412653	K09960	COG3566	S	Uncharacterized protein
2120	At1D1609_23950	CP026924	2405974	2408214	2241	1	NA	outer membrane heme receptor	140.352	21.086	1	0.150236	K16087	COG1629	P	Outer membrane receptor proteins, mostly Fe transport
2198	At1D1609_24800	CP026924	2496411	2496701	291	-1	NA	hypothetical protein	2253.81	438.346	1	0.194491	NA	NA	?	NA
2199	At1D1609_24810	CP026924	2496682	2497107	426	-1	NA	hypothetical protein	3091.59	610.587	1	0.197499	NA	NA	?	NA
2266	At1D1609_25590	CP026924	2573034	2574104	1071	-1	NA	iron-chelator utilization protein	449.948	168.292	1	0.374024	NA	NA	?	NA
2270	At1D1609_25630	CP026924	2575940	2576722	783	-1	NA	iron complex transport system ATP-binding protein	194.153	59.0447	1	0.304115	K02013	COG1120	HP	ABC-type cobalamin/Fe3+-siderophores transport system, ATPase component
2271	At1D1609_25640	CP026924	2576719	2577807	1089	-1	NA	iron complex transport system permease protein	253.242	80.7091	1	0.318703	K02015	COG0609	P	ABC-type Fe3+-siderophore transport system, permease component
2272	At1D1609_25650	CP026924	2577804	2578697	894	-1	NA	iron complex transport system substrate-binding protein	408.296	130.477	1	0.319564	K02016	COG0614	P	ABC-type Fe3+-hydroxamate transport system, periplasmic component
2309	At1D1609_26080	CP026924	2622451	2623062	612	-1	hemO	heme oxygenase	322.766	141.254	1	0.437636	K07215	COG3230	P	Heme oxygenase
2764	At1D1609_31400	CP026925	148360	149385	1026	-1	NA	zinc/manganese transport system substrate-binding protein	314.254	88.3394	0.998662	0.281108	K02077	COG0803;COG3443	P	ABC-type Zn uptake system ZnuABC, Zn-binding component ZnuA;Periplasmic Zn/Cd-binding protein ZinT
2765	At1D1609_31410	CP026925	149414	150280	867	-1	NA	zinc/manganese transport system permease protein	45.9527	12.8751	0.997517	0.280182	K02075	COG1108	P	ABC-type Mn2+/Zn2+ transport system, permease component
2766	At1D1609_31420	CP026925	150273	151100	828	-1	NA	zinc/manganese transport system ATP-binding protein	93.7598	25.169	0.999283	0.268442	K02074	COG1121	P	ABC-type Mn2+/Zn2+ transport system, ATPase component
2767	At1D1609_31430	CP026925	151398	152603	1206	1	NA	hypothetical protein	29.0697	9.25194	0.996911	0.318268	NA	NA	?	NA
2769	At1D1609_31450	CP026925	153295	153564	270	-1	NA	hypothetical protein	31.8946	9.52553	0.998254	0.298656	NA	NA	?	NA
2770	At1D1609_31460	CP026925	153561	154748	1188	-1	NA	cobalamin biosynthesis protein	31.679	10.9575	0.997904	0.345893	NA	NA	?	NA
4715	At1D1609_32190	CP026925	240745	241995	1251	1	NA	hypothetical protein	61.6488	17.4924	0.997975	0.283743	NA	NA	?	NA
2965	At1D1609_33680	CP026925	421586	422341	756	-1	NA	hypothetical protein	155.923	54.3586	1	0.348625	NA	NA	?	NA
2966	At1D1609_33690	CP026925	422446	425151	2706	-1	hasR	heme receptor	19.5574	4.97445	1	0.254351	K16087	COG1629	P	Outer membrane receptor proteins, mostly Fe transport
2969	At1D1609_33720	CP026925	427161	427913	753	-1	NA	iron complex transport system ATP-binding protein	114.37	55.1222	1	0.481963	K02013	COG1120	HP	ABC-type cobalamin/Fe3+-siderophores transport system, ATPase component
2970	At1D1609_33730	CP026925	427907	428974	1068	-1	NA	iron complex transport system permease protein	71.1105	35.262	1	0.495875	K02015	COG0609	P	ABC-type Fe3+-siderophore transport system, permease component
2972	At1D1609_33750	CP026925	430207	431340	1134	-1	NA	iron complex transport system substrate-binding protein	247.704	113.449	1	0.458002	K02016	COG0614	P	ABC-type Fe3+-hydroxamate transport system, periplasmic component
3445	At1D1609_40440	CP026925	1144124	1144666	543	-1	NA	siderophore-interacting protein	292.11	111.323	1	0.381101	K03088	COG1595	K	DNA-directed RNA polymerase specialized sigma subunit, sigma24 family
20	At1D1609_40530	CP026925	1154583	1162304	7722	-1	NA	peptide synthetase	48.686	23.6537	1	0.485841	NA	NA	?	NA
46	At1D1609_40540	CP026925	1162301	1166704	4404	-1	NA	polyketide synthase	57.1332	24.4671	1	0.428246	NA	NA	?	NA
3454	At1D1609_40550	CP026925	1166752	1167312	561	-1	NA	siderophore biosynthesis protein	55.3832	23.9332	1	0.432139	NA	NA	?	NA
3455	At1D1609_40560	CP026925	1167309	1167887	579	-1	NA	hypothetical protein	73.8931	32.9569	1	0.446008	NA	NA	?	NA
3456	At1D1609_40570	CP026925	1167900	1168127	228	-1	mbtH	antibiotic synthesis protein MbtH	97.8046	44.0806	1	0.450701	K05375	COG3251	S	Uncharacterized conserved protein YbdZ, MbtH family
3457	At1D1609_40580	CP026925	1168124	1169527	1404	-1	hemL	glutamate-1-semialdehyde 2,1-aminomutase	40.2052	17.6284	1	0.438462	NA	NA	?	NA
3458	At1D1609_40590	CP026925	1169524	1170414	891	-1	NA	SAM-dependent methlyltransferase	46.6317	18.4816	1	0.396332	NA	NA	?	NA
3459	At1D1609_40600	CP026925	1170407	1174912	4506	-1	NA	peptide synthetase	45.04	18.5368	1	0.411564	NA	NA	?	NA
3460	At1D1609_40610	CP026925	1175333	1177477	2145	1	NA	siderophore biosynthesis protein	65.3736	26.6303	1	0.407355	NA	NA	?	NA
46	At1D1609_40620	CP026925	1177512	1182101	4590	1	NA	polyketide synthase	48.3821	20.9367	1	0.432736	NA	NA	?	NA
3461	At1D1609_40630	CP026925	1182146	1183213	1068	1	NA	siderophore biosynthesis protein	66.6521	32.4888	1	0.487439	NA	NA	?	NA
4938	At1D1609_45350	CP026925	1696439	1696738	300	-1	entB	bifunctional isochorismate lyase	815.057	241.181	1	0.295907	NA	NA	?	NA
3806	At1D1609_45360	CP026925	1696936	1697775	840	-1	yqjH	ferric-chelate reductase (NADPH)	1213.02	378.579	1	0.312097	NA	NA	?	NA
3807	At1D1609_45370	CP026925	1698011	1698964	954	-1	NA	ABC transporter substrate-binding protein	40.0968	16.6959	1	0.41639	K02016	COG0614	P	ABC-type Fe3+-hydroxamate transport system, periplasmic component
4939	At1D1609_45380	CP026925	1698988	1700067	1080	-1	NA	iron complex transport system permease protein	37.9157	14.4976	1	0.382365	K02015	COG0609	P	ABC-type Fe3+-siderophore transport system, permease component
4940	At1D1609_45390	CP026925	1700064	1701077	1014	-1	NA	ABC transporter permease	58.0044	22.1852	1	0.382474	K02015	COG0609	P	ABC-type Fe3+-siderophore transport system, permease component
4941	At1D1609_45400	CP026925	1701074	1701865	792	-1	NA	iron complex transport system ATP-binding protein	200.964	77.7939	1	0.387104	K02013	COG1120	HP	ABC-type cobalamin/Fe3+-siderophores transport system, ATPase component
4942	At1D1609_45410	CP026925	1702089	1703390	1302	1	NA	monooxygenase	56.4976	21.5541	1	0.381504	NA	NA	?	NA
4944	At1D1609_45430	CP026925	1704440	1706533	2094	1	NA	iron complex outermembrane recepter protein	284.312	88.2052	1	0.310241	NA	NA	?	NA
4953	At1D1609_46920	CP026925	1871493	1872716	1224	-1	NA	MFS transporter	53.4101	21.3826	1	0.400348	K05373	COG0477	EGPR	MFS family permease
4954	At1D1609_46930	CP026925	1872716	1875145	2430	-1	NA	iron complex outermembrane recepter protein	50.8638	13.5137	1	0.265684	K02014	COG1629	P	Outer membrane receptor proteins, mostly Fe transport
3933	At1D1609_46940	CP026925	1875256	1876224	969	-1	fecR	iron dicitrate transporter FecR	57.102	25.4992	1	0.446555	K07165	COG3712	PT	Periplasmic ferric-dicitrate binding protein FerR, regulates iron transport through sigma-19
4955	At1D1609_46950	CP026925	1876309	1876848	540	-1	rpoE	RNA polymerase sigma-70 factor, ECF subfamily	132.235	42.5482	1	0.321763	K03088	COG1595	K	DNA-directed RNA polymerase specialized sigma subunit, sigma24 family
3807	At1D1609_47400	CP026925	1938537	1939499	963	-1	NA	iron complex transport system substrate-binding protein	1.84651	0.880129	0.99703	0.476645	K02016	COG0614	P	ABC-type Fe3+-hydroxamate transport system, periplasmic component
4970	At1D1609_47430	CP026925	1941578	1942390	813	-1	NA	iron complex transport system ATP-binding protein	29.8594	14.4071	0.999772	0.482497	K02013	COG1120	HP	ABC-type cobalamin/Fe3+-siderophores transport system, ATPase component
4973	At1D1609_47720	CP026925	1977954	1978829	876	1	NA	AraC family transcriptional regulator	264.459	120.533	1	0.455771	NA	NA	?	NA
4974	At1D1609_47730	CP026925	1978947	1981067	2121	-1	NA	iron complex outermembrane recepter protein	23.7881	11.3577	0.999479	0.477455	K02014	COG1629	P	Outer membrane receptor proteins, mostly Fe transport
3986	At1D1609_47770	CP026925	1984373	1985182	810	1	NA	iron complex transport system ATP-binding protein	12.0183	5.66585	1	0.471435	K02013	COG1120	HP	ABC-type cobalamin/Fe3+-siderophores transport system, ATPase component
4208	At1D1609_54330	CP026927	182945	183649	705	-1	NA	transcriptional regulator	285.291	131.96	1	0.462546	K19732	COG2771;COG2197	KT	DNA-binding transcriptional regulator, CsgD family;DNA-binding response regulator, NarL/FixJ family, contains REC and HTH domains

## Sheet: Up_regulated
C58					1D1609
Locus_tag	Replicon	Gene	RPKM_Ratio	Cluster	Locus_tag	Replicon	Gene	RPKM_Ratio
Atu0946	CC(AE007869)	NA	7.6154	986	At1D1609_09900	CC(CP026924)	NA	0.461772
Atu1865	CC(AE007869)	NA	3.08997	1756	At1D1609_20010	CC(CP026924)	NA	0.769398
Atu2782	CC(AE007869)	NA	2.08978	2607	At1D1609_29450	CC(CP026924)	NA	0.592516
Atu2783	CC(AE007869)	NA	2.32401	2608	At1D1609_29460	CC(CP026924)	NA	0.725955
Atu3578	LC(AE007870)	glpD	2.83866	40	At1D1609_35450	LC(CP026925)	glpA	1.39333
Atu3897	LC(AE007870)	glpD	1.12607		At1D1609_40020	LC(CP026925)	glpA	1.81424
Atu4728	LC(AE007870)	exsA	4.00326	4052	At1D1609_48630	LC(CP026925)	exsA	0.643696
Atu5381	pAt(AE007872)	NA	2.74718	17	At1D1609_27080	CC(CP026924)	NA	0.880244
Atu3795	LC(AE007870)	NA	0.958448		At1D1609_38020	LC(CP026925)	NA	1.15216
Atu4219	LC(AE007870)	NA	0.86459
Atu5382	pAt(AE007872)	NA	3.3006	6360	-	-	-	-
Atu5383	pAt(AE007872)	NA	3.37508	6361	-	-	-	-
Atu6044	pTi(AE007871)	repB	2.25692	4118	At1D1609_50990	pTi(CP026926)	repB	1.64795
Atu6098	pTi(AE007871)	NA	3.45936	6084	-	-	-	-
Atu6109	pTi(AE007871)	NA	3.00364	4229	At1D1609_55380	pAtb(CP026928)	NA	1.94626
Atu6120	pTi(AE007871)	hupT	2.03448	4156	At1D1609_51790	pTi(CP026926)	hupT	7.81412
Atu6121	pTi(AE007871)	ych	25.7312	6090	-	-	-	-
Atu6137	pTi(AE007871)	NA	8.71931	6094	-	-	-	-
Atu6138	pTi(AE007871)	accR	3.0388	6095	-	-	-	-
Atu6149	pTi(AE007871)	NA	22.7492	6103	-	-	-	-
Atu6150	pTi(AE007871)	virH1	81.3134	6104	-	-	-	-
Atu6151	pTi(AE007871)	virH2	83.1787	4219	At1D1609_54510	pAta(CP026927)	virH2	38.9
Atu6152	pTi(AE007871)	tnp	48.2833	107	At1D1609_51220	pTi(CP026926)	NA	1.20866
					At1D1609_55640	pAtb(CP026928)	NA	1.1225
Atu6154	pTi(AE007871)	virF	10.5521	6106	-	-	-	-
Atu6155	pTi(AE007871)	NA	410.175	6107	-	-	-	-
Atu6156	pTi(AE007871)	virK	95.2771	4218	At1D1609_54500	pAta(CP026927)	virK	3.07698
Atu6157	pTi(AE007871)	NA	35.9772	6108	-	-	-	-
Atu6160	pTi(AE007871)	ynh	3.7947	6111	-	-	-	-
Atu6162	pTi(AE007871)	NA	10.8664	6113	-	-	-	-
Atu6164	pTi(AE007871)	tzs	214.633	6115	-	-	-	-
Atu6165	pTi(AE007871)	NA	6.45982	6116	-	-	-	-
Atu6166	pTi(AE007871)	virA	8.02301	4217	At1D1609_54480	pAta(CP026927)	virA	1.18086
Atu6167	pTi(AE007871)	virB1	1235.37	4121	At1D1609_51060	pTi(CP026926)	virB1	710.743
Atu6168	pTi(AE007871)	virB2	1018.23	4122	At1D1609_51070	pTi(CP026926)	virB2	46.0398
Atu6169	pTi(AE007871)	virB3	548.354	4123	At1D1609_51075	pTi(CP026926)	virB3	189.822
Atu6170	pTi(AE007871)	virB4	273.424	105	At1D1609_51080	pTi(CP026926)	virB4	89.2212
Atu5165	pAt(AE007872)	avhB4	0.888524
Atu6171	pTi(AE007871)	virB5	180.279	4124	At1D1609_51090	pTi(CP026926)	virB5	49.4921
Atu6172	pTi(AE007871)	virB6	97.1757	4125	At1D1609_51100	pTi(CP026926)	virB6	46.1225
Atu6173	pTi(AE007871)	virB7	64.9997	4126	At1D1609_51110	pTi(CP026926)	virB7	17.4471
Atu6174	pTi(AE007871)	virB8	50.4327	4127	At1D1609_51120	pTi(CP026926)	virB8	21.0615
Atu6175	pTi(AE007871)	virB9	25.3696	4128	At1D1609_51130	pTi(CP026926)	virB9	18.77
Atu6176	pTi(AE007871)	virB10	7.02359	4129	At1D1609_51140	pTi(CP026926)	virB10	13.0815
Atu6177	pTi(AE007871)	virB11	6.90416	4130	At1D1609_51150	pTi(CP026926)	virB11	9.44793
Atu6179	pTi(AE007871)	virC2	30.6003	4133	At1D1609_51300	pTi(CP026926)	virC2	27.6207
Atu6180	pTi(AE007871)	virC1	139.107	4134	At1D1609_51310	pTi(CP026926)	virC1	51.1442
Atu6181	pTi(AE007871)	virD1	142.621	4135	At1D1609_51320	pTi(CP026926)	virD1	357.622
Atu6182	pTi(AE007871)	virD2	123.788	4136	At1D1609_51330	pTi(CP026926)	virD2	74.2001
Atu6183	pTi(AE007871)	virD3	37.1216	6117	-	-	-	-
Atu6184	pTi(AE007871)	virD4	3.78957	4137	At1D1609_51350	pTi(CP026926)	virD4	7.29805
Atu6185	pTi(AE007871)	virD5	2.85334	4138	At1D1609_51360	pTi(CP026926)	virD5	4.62668
Atu6186	pTi(AE007871)	virE3	2.17281	6118	-	-	-	-
Atu6188	pTi(AE007871)	virE0	98.0283	6119	-	-	-	-
Atu6189	pTi(AE007871)	virE1	115.268	4139	At1D1609_51370	pTi(CP026926)	virE1	88.4057
Atu6190	pTi(AE007871)	virE2	98.7017	4140	At1D1609_51380	pTi(CP026926)	virE2	87.0903
Atu6191	pTi(AE007871)	virE3	58.5148	4141	At1D1609_51390	pTi(CP026926)	virE3	35.6493
Atu0173	CC(AE007869)	phnD	0.952714	273	At1D1609_01540	CC(CP026924)	phnD	2.87425
Atu0174	CC(AE007869)	phnC	1.35189	274	At1D1609_01550	CC(CP026924)	phnC	6.85291
Atu0305	CC(AE007869)	ugpA	0.78221	405	At1D1609_03450	CC(CP026924)	ugpB	5.20452
Atu1534	CC(AE007869)	fixP	0.851058	1486	At1D1609_15720	CC(CP026924)	fixP	2.17892
Atu1535	CC(AE007869)	fixQ	1.55643	1487	At1D1609_15730	CC(CP026924)	fixQ	2.84906
Atu1536	CC(AE007869)	fixO	1.61027	1488	At1D1609_15740	CC(CP026924)	fixO	2.10391
-	-	-	-	4644	At1D1609_24190	CC(CP026924)	NA	3.36334
Atu4827	LC(AE007870)	NA	0.942915	3242	At1D1609_37320	LC(CP026925)	NA	2.19269
Atu4826	LC(AE007870)	NA	0.943027	3243	At1D1609_37330	LC(CP026925)	NA	2.31329
Atu4822	LC(AE007870)	NA	0.799464	3247	At1D1609_37370	LC(CP026925)	NA	2.0477
Atu4821	LC(AE007870)	fabG	0.995719	3248	At1D1609_37380	LC(CP026925)	fabG	2.02218
Atu4238	LC(AE007870)	NA	1.37319	3316	At1D1609_38150	LC(CP026925)	NA	2.21042
Atu4237	LC(AE007870)	NA	1.72107	3317	At1D1609_38160	LC(CP026925)	NA	2.2207
Atu4029	LC(AE007870)	NA	0.834057	3521	At1D1609_41520	LC(CP026925)	NA	2.67142
Atu4030	LC(AE007870)	NA	0.810083	3522	At1D1609_41530	LC(CP026925)	rbsC	2.89888
Atu4031	LC(AE007870)	NA	0.847216	3523	At1D1609_41540	LC(CP026925)	rbsC	2.56058
Atu4032	LC(AE007870)	NA	0.876806	3524	At1D1609_41550	LC(CP026925)	rbsA	2.82583
Atu4033	LC(AE007870)	NA	1.01612	3525	At1D1609_41560	LC(CP026925)	rbsB	2.62294
Atu4407	LC(AE007870)	napD	1.50089	3801	At1D1609_45290	LC(CP026925)	napD	2.03449
Atu4409	LC(AE007870)	napB	1.70601	3803	At1D1609_45310	LC(CP026925)	napB	2.14879
-	-	-	-	5054	At1D1609_49800	LC(CP026925)	NA	10.997
Atu2483	CC(AE007869)	mexF	0.830148	7	At1D1609_49820	LC(CP026925)	acrB	2.23584
Atu2551	CC(AE007869)	NA	0.809907		At1D1609_31620	LC(CP026925)	acrB	1.31743
Atu3202	LC(AE007870)	NA	1.20749		At1D1609_27190	CC(CP026924)	acrB	0.846901
					At1D1609_25910	CC(CP026924)	NA	0.67084
-	-	-	-	5056	At1D1609_49830	LC(CP026925)	NA	4.02032
Atu6045	pTi(AE007871)	repC	1.43343	4119	At1D1609_51000	pTi(CP026926)	repC	2.00686
Atu6178	pTi(AE007871)	virG	1.41264	4131	At1D1609_51160	pTi(CP026926)	virG	18.1766
-	-	-	-	5118	At1D1609_51170	pTi(CP026926)	NA	13.2593
-	-	-	-	8	At1D1609_51180	pTi(CP026926)	NA	2.03567
					At1D1609_51190	pTi(CP026926)	NA	1.71827
					At1D1609_51230	pTi(CP026926)	NA	1.49229
					At1D1609_51680	pTi(CP026926)	NA	1.34909
					At1D1609_54540	pAta(CP026927)	NA	1.11641
					At1D1609_54550	pAta(CP026927)	NA	1.13616
					At1D1609_55610	pAtb(CP026928)	NA	0.961167
-	-	-	-	5121	At1D1609_51280	pTi(CP026926)	NA	3.49607
-	-	-	-	5122	At1D1609_51290	pTi(CP026926)	NA	13.674
-	-	-	-	5123	At1D1609_51340	pTi(CP026926)	virD3	102.959
-	-	-	-	5124	At1D1609_51400	pTi(CP026926)	NA	43.0413
-	-	-	-	5125	At1D1609_51410	pTi(CP026926)	NA	6.81059
-	-	-	-	5126	At1D1609_51420	pTi(CP026926)	NA	6.5323
-	-	-	-	5127	At1D1609_51430	pTi(CP026926)	cspA	5.01561
Atu4265	LC(AE007870)	NA	0.861071	4142	At1D1609_51440	pTi(CP026926)	NA	2.51339
-	-	-	-	5129	At1D1609_51490	pTi(CP026926)	NA	80.2836
-	-	-	-	5130	At1D1609_51500	pTi(CP026926)	NA	27.0086
-	-	-	-	5131	At1D1609_51510	pTi(CP026926)	gph	116.269
-	-	-	-	5132	At1D1609_51520	pTi(CP026926)	NA	51.7504
-	-	-	-	5133	At1D1609_51530	pTi(CP026926)	NA	470.653
-	-	-	-	5136	At1D1609_51580	pTi(CP026926)	NA	2.1581
-	-	-	-	5143	At1D1609_51770	pTi(CP026926)	NA	3.56505
-	-	-	-	5160	At1D1609_52200	pTi(CP026926)	NA	2.30647
-	-	-	-	5161	At1D1609_52210	pTi(CP026926)	frlB	2.17743
-	-	-	-	5162	At1D1609_52230	pTi(CP026926)	fabG	2.52468
Atu0598	CC(AE007869)	edd	1.03171	66	At1D1609_52250	pTi(CP026926)	edd	2.35088
					At1D1609_06500	CC(CP026924)	edd	1.24316
Atu4876	LC(AE007870)	NA	0.764541	110	At1D1609_52260	pTi(CP026926)	NA	2.06107
Atu5198	pAt(AE007872)	NA	0.830027
-	-	-	-	5291	At1D1609_54470	pAta(CP026927)	NA	17.223
-	-	-	-	5295	At1D1609_54560	pAta(CP026927)	NA	2.1509
-	-	-	-	5296	At1D1609_54570	pAta(CP026927)	NA	6.04973
-	-	-	-	5297	At1D1609_54580	pAta(CP026927)	NA	15.1098

## Sheet: Down_regulated
C58					1D1609
Locus_tag	Replicon	Gene	RPKM_Ratio	Cluster	Locus_tag	Replicon	Gene	RPKM_Ratio
Atu0035	CC(AE007869)	pckA	0.275782	155	At1D1609_00340	CC(CP026924)	pckA	0.282941
Atu0607	CC(AE007869)	aceA	0.444728	681	At1D1609_06590	CC(CP026924)	aceA	0.889449
Atu0886	CC(AE007869)	NA	0.340627	936	At1D1609_09320	CC(CP026924)	NA	0.800737
Atu0887	CC(AE007869)	NA	0.443266	937	At1D1609_09330	CC(CP026924)	NA	0.779515
Atu1049	CC(AE007869)	NA	0.267323	1077	At1D1609_10970	CC(CP026924)	znuA	0.275943
Atu1610	CC(AE007869)	dhs	0.46514	1543	At1D1609_16320	CC(CP026924)	dhs	0.663104
Atu2287	CC(AE007869)	NA	0.489734	2120	At1D1609_23950	CC(CP026924)	NA	0.150236
Atu2382	CC(AE007869)	NA	0.482444	2198	At1D1609_24800	CC(CP026924)	NA	0.194491
Atu2472	CC(AE007869)	NA	0.490306	5665	-	-	-	-
Atu3181	LC(AE007870)	NA	0.319766	2767	At1D1609_31430	LC(CP026925)	NA	0.318268
Atu3182	LC(AE007870)	NA	0.386194	2768	At1D1609_31440	LC(CP026925)	NA	0.76496
Atu3183	LC(AE007870)	NA	0.284105	2769	At1D1609_31450	LC(CP026925)	NA	0.298656
Atu3184	LC(AE007870)	NA	0.278863	2770	At1D1609_31460	LC(CP026925)	NA	0.345893
Atu3666	LC(AE007870)	NA	0.431598	5768	-	-	-	-
Atu3667	LC(AE007870)	panD	0.419117	5769	-	-	-	-
Atu3669	LC(AE007870)	NA	0.432271	3462	At1D1609_40650	LC(CP026925)	NA	1.08588
Atu3670	LC(AE007870)	NA	0.43068	20	At1D1609_40530	LC(CP026925)	NA	0.485841
Atu3682	LC(AE007870)	NA	0.418707		At1D1609_40640	LC(CP026925)	NA	0.535028
Atu3683	LC(AE007870)	NA	0.436473
Atu3671	LC(AE007870)	NA	0.428473	3461	At1D1609_40630	LC(CP026925)	NA	0.487439
Atu3672	LC(AE007870)	NA	0.432049	46	At1D1609_40540	LC(CP026925)	NA	0.428246
Atu3681	LC(AE007870)	NA	0.405199	46	At1D1609_40620	LC(CP026925)	NA	0.432736
Atu3673	LC(AE007870)	NA	0.434874	3460	At1D1609_40610	LC(CP026925)	NA	0.407355
Atu3675	LC(AE007870)	NA	0.423926	3459	At1D1609_40600	LC(CP026925)	NA	0.411564
Atu3676	LC(AE007870)	NA	0.428282	3458	At1D1609_40590	LC(CP026925)	NA	0.396332
Atu3677	LC(AE007870)	NA	0.441472	3457	At1D1609_40580	LC(CP026925)	hemL	0.438462
Atu3678	LC(AE007870)	NA	0.43806	3456	At1D1609_40570	LC(CP026925)	mbtH	0.450701
Atu3679	LC(AE007870)	NA	0.431646	3455	At1D1609_40560	LC(CP026925)	NA	0.446008
Atu3680	LC(AE007870)	NA	0.411874	3454	At1D1609_40550	LC(CP026925)	NA	0.432139
Atu3684	LC(AE007870)	NA	0.442377	3453	At1D1609_40520	LC(CP026925)	NA	0.50976
Atu3685	LC(AE007870)	NA	0.441773	3452	At1D1609_40510	LC(CP026925)	NA	0.668174
Atu3687	LC(AE007870)	NA	0.493858	3450	At1D1609_40490	LC(CP026925)	NA	0.76829
Atu3690	LC(AE007870)	fecD	0.48578	3447	At1D1609_40460	LC(CP026925)	NA	0.970449
Atu3920	LC(AE007870)	NA	0.499651	5810	-	-	-	-
Atu4447	LC(AE007870)	NA	0.446171	3834	At1D1609_45740	LC(CP026925)	smoE	1.00308
Atu5300	pAt(AE007872)	NA	0.403439	6313	-	-	-	-
Atu0161	CC(AE007869)	exbB	0.680586	262	At1D1609_01430	CC(CP026924)	exbB	0.455211
Atu0162	CC(AE007869)	exbD	0.635088	263	At1D1609_01440	CC(CP026924)	exbD	0.440734
Atu0163	CC(AE007869)	tonB	0.663914	264	At1D1609_01450	CC(CP026924)	tonB	0.446948
Atu0229	CC(AE007869)	NA	0.540796	321	At1D1609_02050	CC(CP026924)	NA	0.412854
Atu0410	CC(AE007869)	NA	0.58411	506	At1D1609_04480	CC(CP026924)	NA	0.475378
Atu8135	CC(AE007869)	NA	1.12915	720	At1D1609_07020	CC(CP026924)	NA	0.422501
Atu0671	CC(AE007869)	NA	0.506298	737	At1D1609_07200	CC(CP026924)	NA	0.098683
Atu0946	CC(AE007869)	NA	7.6154	986	At1D1609_09900	CC(CP026924)	NA	0.461772
-	-	-	-	4440	At1D1609_12720	CC(CP026924)	NA	0.293548
-	-	-	-	4441	At1D1609_12730	CC(CP026924)	NA	0.267858
-	-	-	-	4442	At1D1609_12740	CC(CP026924)	NA	0.251731
-	-	-	-	4443	At1D1609_12750	CC(CP026924)	NA	0.237286
-	-	-	-	4444	At1D1609_12760	CC(CP026924)	ftn	0.261946
Atu1521	CC(AE007869)	znuA	0.918927	1474	At1D1609_15590	CC(CP026924)	znuA	0.46421
-	-	-	-	4500	At1D1609_17480	CC(CP026924)	NA	0.401611
-	-	-	-	4501	At1D1609_17490	CC(CP026924)	NA	0.407188
-	-	-	-	4504	At1D1609_17520	CC(CP026924)	NA	0.446953
-	-	-	-	4513	At1D1609_17610	CC(CP026924)	NA	0.497379
-	-	-	-	4514	At1D1609_17620	CC(CP026924)	NA	0.480463
-	-	-	-	4515	At1D1609_17630	CC(CP026924)	NA	0.427124
-	-	-	-	4516	At1D1609_17640	CC(CP026924)	NA	0.475784
-	-	-	-	4517	At1D1609_17650	CC(CP026924)	NA	0.4708
-	-	-	-	4518	At1D1609_17660	CC(CP026924)	NA	0.466507
-	-	-	-	4519	At1D1609_17670	CC(CP026924)	NA	0.461632
-	-	-	-	4520	At1D1609_17680	CC(CP026924)	NA	0.409894
-	-	-	-	4521	At1D1609_17690	CC(CP026924)	NA	0.414889
-	-	-	-	4522	At1D1609_17700	CC(CP026924)	NA	0.402379
-	-	-	-	4523	At1D1609_17710	CC(CP026924)	NA	0.387963
-	-	-	-	4524	At1D1609_17720	CC(CP026924)	NA	0.412653
Atu2383	CC(AE007869)	NA	0.514373	2199	At1D1609_24810	CC(CP026924)	NA	0.197499
Atu2454	CC(AE007869)	NA	0.597657	2266	At1D1609_25590	CC(CP026924)	NA	0.374024
Atu2458	CC(AE007869)	hmuV	0.61189	2270	At1D1609_25630	CC(CP026924)	NA	0.304115
Atu2459	CC(AE007869)	hmuU	0.635332	2271	At1D1609_25640	CC(CP026924)	NA	0.318703
Atu2460	CC(AE007869)	hmuT	0.615896	2272	At1D1609_25650	CC(CP026924)	NA	0.319564
Atu2502	CC(AE007869)	hemO	0.695745	2309	At1D1609_26080	CC(CP026924)	hemO	0.437636
Atu3178	LC(AE007870)	NA	0.513585	2764	At1D1609_31400	LC(CP026925)	NA	0.281108
Atu3179	LC(AE007870)	NA	0.588232	2765	At1D1609_31410	LC(CP026925)	NA	0.280182
Atu3180	LC(AE007870)	NA	0.622978	2766	At1D1609_31420	LC(CP026925)	NA	0.268442
-	-	-	-	4715	At1D1609_32190	LC(CP026925)	NA	0.283743
Atu3384	LC(AE007870)	NA	0.593299	2965	At1D1609_33680	LC(CP026925)	NA	0.348625
Atu3385	LC(AE007870)	hasR	0.528776	2966	At1D1609_33690	LC(CP026925)	hasR	0.254351
Atu3388	LC(AE007870)	fecE	0.715989	2969	At1D1609_33720	LC(CP026925)	NA	0.481963
Atu3389	LC(AE007870)	NA	0.699523	2970	At1D1609_33730	LC(CP026925)	NA	0.495875
Atu3391	LC(AE007870)	NA	0.695247	2972	At1D1609_33750	LC(CP026925)	NA	0.458002
Atu3692	LC(AE007870)	NA	0.646572	3445	At1D1609_40440	LC(CP026925)	NA	0.381101
-	-	-	-	4938	At1D1609_45350	LC(CP026925)	entB	0.295907
Atu5313	pAt(AE007872)	NA	0.711293	3806	At1D1609_45360	LC(CP026925)	yqjH	0.312097
-	-	-	-	3807	At1D1609_45370	LC(CP026925)	NA	0.41639
					At1D1609_47400	LC(CP026925)	NA	0.476645
-	-	-	-	4939	At1D1609_45380	LC(CP026925)	NA	0.382365
-	-	-	-	4940	At1D1609_45390	LC(CP026925)	NA	0.382474
-	-	-	-	4941	At1D1609_45400	LC(CP026925)	NA	0.387104
-	-	-	-	4942	At1D1609_45410	LC(CP026925)	NA	0.381504
-	-	-	-	4944	At1D1609_45430	LC(CP026925)	NA	0.310241
-	-	-	-	4953	At1D1609_46920	LC(CP026925)	NA	0.400348
-	-	-	-	4954	At1D1609_46930	LC(CP026925)	NA	0.265684
Atu5310	pAt(AE007872)	NA	0.844618	3933	At1D1609_46940	LC(CP026925)	fecR	0.446555
-	-	-	-	4955	At1D1609_46950	LC(CP026925)	rpoE	0.321763
-	-	-	-	4970	At1D1609_47430	LC(CP026925)	NA	0.482497
-	-	-	-	4973	At1D1609_47720	LC(CP026925)	NA	0.455771
-	-	-	-	4974	At1D1609_47730	LC(CP026925)	NA	0.477455
Atu5316	pAt(AE007872)	fepC	0.870064	3986	At1D1609_47770	LC(CP026925)	NA	0.471435
-	-	-	-	4208	At1D1609_54330	pAta(CP026927)	NA	0.462546
					At1D1609_56390	pAtb(CP026928)	NA	0.743588
