# Supplementary material for: Differentiations in Gene Content and Expression Response to Virulence Induction Between Two Agrobacterium Strains
Source: Front Microbiol. 2019 Jul 9;10:1554. doi: 10.3389/fmicb.2019.01554 (PMC6629968; doi:10.3389/fmicb.2019.01554)
Supplement: TABLE S4 — Association between VirG-binding motifs and up-regulated genes. Four separate sheets are included; each strain has one sheet for a summary report and one sheet for detailed information regarding the locations and the exact sequences of motifs. [file Table_4.XLSX]

## Sheet: C58_summary
Cluster	Locus_tag	Contig	Start	End	Length	Strand	Gene	Product	Known_vir_gene	VirG_motif
986	Atu0946	AE007869	935237	936337	1101	-1	NA	dehydrogenase	No	No
1756	Atu1865	AE007869	1845156	1845392	237	-1	NA	hypothetical protein	No	Yes
2607	Atu2782	AE007869	2787259	2787849	591	-1	NA	acetyltransferase	No	Regulon
2608	Atu2783	AE007869	2787846	2788478	633	-1	NA	acetyltransferase	No	Yes
40	Atu3578	AE007870	632366	633913	1548	-1	glpD	glycerol-3-phosphate dehydrogenase	No	Yes
4052	Atu4728	AE007870	1891371	1893173	1803	1	exsA	ABC transporter, nucleotide binding/ATPase protein	No	No
17	Atu5381	AE007872	371016	374174	3159	-1	NA	AcrB/AcrD/AcrF family protein	No	Regulon
6360	Atu5382	AE007872	374200	375354	1155	-1	NA	HlyD family secretion protein	No	Yes
6361	Atu5383	AE007872	375414	376013	600	-1	NA	transcriptional regulator, TetR family	No	No
4118	Atu6044	AE007871	53578	54690	1113	1	repB	replication protein	No	Yes
6084	Atu6098	AE007871	118471	118932	462	-1	NA	transcriptional regulator, HTH family	No	No
4229	Atu6109	AE007871	130449	131048	600	1	NA	conserved hypothetical protein	No	No
4156	Atu6120	AE007871	139472	139750	279	-1	hupT	HNS-type DNA binding protein	No	No
6090	Atu6121	AE007871	139890	140147	258	-1	ych	conserved hypothetical protein	No	No
6094	Atu6137	AE007871	156936	157232	297	-1	NA	hypothetical protein	No	Yes
6095	Atu6138	AE007871	157464	158240	777	1	accR	Repressor of the acc and arc operons	No	Yes
6103	Atu6149	AE007871	167545	167880	336	1	NA	hypothetical protein	No	Regulon
6104	Atu6150	AE007871	167883	169142	1260	1	virH1	P-450 monooxygenase	Yes	Yes
4219	Atu6151	AE007871	169219	170394	1176	1	virH2	P-450 monoxygenase	Yes	Yes
107	Atu6152	AE007871	170670	171593	924	1	tnp	transposase	No	No
6106	Atu6154	AE007871	172489	173427	939	1	virF	exported virulence protein	Yes	Yes
6107	Atu6155	AE007871	173878	174306	429	1	NA	conserved hypothetical protein	No	Yes
4218	Atu6156	AE007871	174328	174762	435	1	virK	virA/G regulated gene	Yes	Yes
6108	Atu6157	AE007871	174806	175120	315	1	NA	conserved hypothetical protein	No	Yes
6111	Atu6160	AE007871	176065	176244	180	1	ynh	conserved hypothetical protein	No	Yes
6113	Atu6162	AE007871	177407	178117	711	-1	NA	conserved hypothetical protein	No	Yes
6115	Atu6164	AE007871	179262	179993	732	-1	tzs	trans-zeatin secretion protein	No	Yes
6116	Atu6165	AE007871	180279	180470	192	1	NA	hypothetical protein	No	Yes
4217	Atu6166	AE007871	180831	183332	2502	1	virA	two component sensor kinase	Yes	Yes
4121	Atu6167	AE007871	183877	184614	738	1	virB1	component of type IV secretion system	Yes	Yes
4122	Atu6168	AE007871	184614	184979	366	1	virB2	component of type IV secretion system, pilin subunit	Yes	Regulon
4123	Atu6169	AE007871	184979	185305	327	1	virB3	component of type IV secretion system	Yes	Regulon
105	Atu6170	AE007871	185305	187674	2370	1	virB4	component of type IV secretion system	Yes	Regulon
4124	Atu6171	AE007871	187691	188353	663	1	virB5	component of type IV secretion system	Yes	Regulon
4125	Atu6172	AE007871	188454	189341	888	1	virB6	component of type IV secretion system	Yes	Regulon
4126	Atu6173	AE007871	189377	189544	168	1	virB7	component of type IV secretion system	Yes	Yes
4127	Atu6174	AE007871	189531	190244	714	1	virB8	component of type IV secretion system	Yes	Regulon
4128	Atu6175	AE007871	190241	191122	882	1	virB9	component of type IV secretion system	Yes	Yes
4129	Atu6176	AE007871	191119	192252	1134	1	virB10	component of type IV secretion system	Yes	Yes
4130	Atu6177	AE007871	192293	193327	1035	1	virB11	component of type IV secretion system	Yes	Yes
4133	Atu6179	AE007871	194449	195057	609	-1	virC2	virA/G regulated protein	Yes	Yes
4134	Atu6180	AE007871	195060	195755	696	-1	virC1	virA/G regulated protein	Yes	Yes
4135	Atu6181	AE007871	196026	196469	444	1	virD1	virA/G regulated topoisomerase	Yes	Yes
4136	Atu6182	AE007871	196503	197846	1344	1	virD2	endonuclease	Yes	Regulon
6117	Atu6183	AE007871	197861	199882	2022	1	virD3	virA/G regulated protein	Yes	Yes
4137	Atu6184	AE007871	199956	201962	2007	1	virD4	virA/G regulated protein	Yes	Regulon
4138	Atu6185	AE007871	202074	204596	2523	1	virD5	virA/G regulated protein	Yes	Yes
6118	Atu6186	AE007871	204666	205232	567	1	virE3	virA/G regulated protein	Yes	Yes
6119	Atu6188	AE007871	205684	205935	252	1	virE0	virA/G regulated protein	Yes	Yes
4139	Atu6189	AE007871	206051	206242	192	1	virE1	protein secretion chaperone	Yes	Yes
4140	Atu6190	AE007871	206256	207926	1671	1	virE2	exported virulence protein	Yes	Regulon
4141	Atu6191	AE007871	207993	210047	2055	1	virE3	virA/G regulated protein	Yes	Yes

## Sheet: 1D1609_summary
Cluster	Locus_tag	Contig	Start	End	Length	Strand	Gene	Product	Known_vir_gene	VirG_motif
273	At1D1609_01540	CP026924	177041	177946	906	-1	phnD	phosphonate transport system substrate-binding protein	No	Yes
274	At1D1609_01550	CP026924	178032	178892	861	-1	phnC	phosphonate transport system ATP-binding protein	No	Yes
405	At1D1609_03450	CP026924	356761	358059	1299	1	ugpB	sn-glycerol 3-phosphate transport system substrate-binding protein	No	Yes
1486	At1D1609_15720	CP026924	1577719	1578582	864	-1	fixP	cytochrome c oxidase, FixP chain	No	Regulon
1487	At1D1609_15730	CP026924	1578586	1578738	153	-1	fixQ	cytochrome c oxidase, FixQ chain	No	Yes
1488	At1D1609_15740	CP026924	1578752	1579483	732	-1	fixO	cytochrome c oxidase, FixO chain	No	No
4644	At1D1609_24190	CP026924	2436050	2436277	228	-1	NA	hypothetical protein	No	Yes
3242	At1D1609_37320	CP026925	817472	819349	1878	1	NA	ABC transporter permease	No	No
3243	At1D1609_37330	CP026925	819416	820426	1011	1	NA	ABC transporter substrate-binding protein	No	No
3247	At1D1609_37370	CP026925	823359	824984	1626	1	NA	acyl-CoA synthetase	No	No
3248	At1D1609_37380	CP026925	825016	825783	768	1	fabG	3-oxoacyl-[acyl-carrier-protein] reductase	No	No
3316	At1D1609_38150	CP026925	909502	910347	846	-1	NA	hydrolase	No	No
3317	At1D1609_38160	CP026925	910359	910961	603	-1	NA	peptide synthetase	No	No
3521	At1D1609_41520	CP026925	1284686	1285606	921	-1	NA	gluconolactonase	No	Regulon
3522	At1D1609_41530	CP026925	1285642	1286589	948	-1	rbsC	ribose transport system permease protein	No	Regulon
3523	At1D1609_41540	CP026925	1286586	1287527	942	-1	rbsC	ribose transport system permease protein	No	Regulon
3524	At1D1609_41550	CP026925	1287524	1288987	1464	-1	rbsA	ribose transport system ATP-binding protein	No	Regulon
3525	At1D1609_41560	CP026925	1289086	1290102	1017	-1	rbsB	ribose transport system substrate-binding protein	No	Yes
3801	At1D1609_45290	CP026925	1690198	1690485	288	1	napD	periplasmic nitrate reductase NapD	No	No
3803	At1D1609_45310	CP026925	1692961	1693425	465	1	napB	cytochrome c-type protein NapB	No	No
5054	At1D1609_49800	CP026925	2203407	2204213	807	-1	NA	hypothetical protein	No	Yes
7	At1D1609_49820	CP026925	2205132	2208272	3141	-1	acrB	multidrug efflux pump	No	Yes
5056	At1D1609_49830	CP026925	2208276	2209430	1155	-1	NA	hemolysin D	No	Yes
4119	At1D1609_51000	CP026926	2665	3984	1320	1	repC	replication protein C	No	Yes
4121	At1D1609_51060	CP026926	13045	13764	720	1	virB1	type IV secretion system lytic transglycosylase VirB1	Yes	Yes
4122	At1D1609_51070	CP026926	13779	14144	366	1	virB2	type IV secretion system protein VirB2	Yes	Regulon
4123	At1D1609_51075	CP026926	14144	14470	327	1	virB3	type IV secretion system protein VirB3	Yes	Regulon
105	At1D1609_51080	CP026926	14470	16839	2370	1	virB4	type IV secretion system protein VirB4	Yes	Regulon
4124	At1D1609_51090	CP026926	16854	17516	663	1	virB5	type IV secretion system protein VirB5	Yes	Yes
4125	At1D1609_51100	CP026926	17613	18500	888	1	virB6	type IV secretion system protein VirB6	Yes	Regulon
4126	At1D1609_51110	CP026926	18534	18701	168	1	virB7	type IV secretion system protein VirB7	Yes	Yes
4127	At1D1609_51120	CP026926	18688	19401	714	1	virB8	type IV secretion system protein VirB8	Yes	Yes
4128	At1D1609_51130	CP026926	19398	20279	882	1	virB9	type IV secretion system protein VirB9	Yes	Yes
4129	At1D1609_51140	CP026926	20276	21409	1134	1	virB10	type IV secretion system protein VirB10	Yes	Regulon
4130	At1D1609_51150	CP026926	21449	22480	1032	1	virB11	type IV secretion system protein VirB11	Yes	Yes
4131	At1D1609_51160	CP026926	22690	23415	726	1	virG	two-component response regulator VirG	Yes	Yes
5118	At1D1609_51170	CP026926	23474	23857	384	1	NA	hypothetical protein	No	Yes
8	At1D1609_51180	CP026926	23913	24236	324	-1	NA	transposase	No	No
5121	At1D1609_51280	CP026926	32733	32924	192	-1	NA	hypothetical protein	No	Regulon
5122	At1D1609_51290	CP026926	32875	33267	393	-1	NA	transposase	No	Yes
4133	At1D1609_51300	CP026926	33393	34001	609	-1	virC2	crown gall tumor protein VirC2	Yes	Yes
4134	At1D1609_51310	CP026926	34004	34699	696	-1	virC1	crown gall tumor protein VirC1	Yes	Yes
4135	At1D1609_51320	CP026926	34968	35411	444	1	virD1	type IV secretion system T-DNA border endonuclease VirD1	Yes	Yes
4136	At1D1609_51330	CP026926	35445	36719	1275	1	virD2	type IV secretion system T-DNA border endonuclease VirD2	Yes	Yes
5123	At1D1609_51340	CP026926	36739	37344	606	1	virD3	virA/G regulated protein	Yes	Regulon
4137	At1D1609_51350	CP026926	37373	39343	1971	1	virD4	type IV secretion system protein VirD4	Yes	Yes
4138	At1D1609_51360	CP026926	39435	41936	2502	1	virD5	virA/G regulated protein	Yes	Regulon
4139	At1D1609_51370	CP026926	42389	42586	198	1	virE1	type IV secretion system chaperone VirE1	Yes	Yes
4140	At1D1609_51380	CP026926	42591	44192	1602	1	virE2	type IV secretion system single-stranded DNA binding protein VirE2	Yes	Yes
4141	At1D1609_51390	CP026926	44258	46276	2019	1	virE3	virA/G regulated protein	Yes	Yes
5124	At1D1609_51400	CP026926	46524	46718	195	1	NA	hypothetical protein	No	Yes
5125	At1D1609_51410	CP026926	46888	47196	309	1	NA	integration host factor beta subunit	No	Yes
5126	At1D1609_51420	CP026926	47247	47612	366	1	NA	hypothetical protein	No	Regulon
5127	At1D1609_51430	CP026926	47626	47928	303	1	cspA	cold shock protein	No	Regulon
4142	At1D1609_51440	CP026926	48251	48751	501	1	NA	amino acid transporter	No	No
5129	At1D1609_51490	CP026926	51488	52096	609	1	NA	VirF	No	Yes
5130	At1D1609_51500	CP026926	52789	53031	243	1	NA	hypothetical protein	No	No
5131	At1D1609_51510	CP026926	53679	54311	633	1	gph	phosphoglycolate phosphatase	No	Yes
5132	At1D1609_51520	CP026926	54391	54603	213	1	NA	hypothetical protein	No	Yes
5133	At1D1609_51530	CP026926	54977	55504	528	1	NA	VirH	No	Yes
5136	At1D1609_51580	CP026926	59896	60021	126	-1	NA	hypothetical protein	No	No
5143	At1D1609_51770	CP026926	87053	87154	102	-1	NA	hypothetical protein	No	Yes
4156	At1D1609_51790	CP026926	87612	87890	279	-1	hupT	HNS-type DNA binding protein	No	Yes
5160	At1D1609_52200	CP026926	126890	127708	819	-1	NA	hypothetical protein	No	Yes
5161	At1D1609_52210	CP026926	127718	128740	1023	-1	frlB	fructoselysine 6-phosphate deglycase	No	Yes
5162	At1D1609_52230	CP026926	130228	130974	747	1	fabG	3-oxoacyl-[acyl-carrier-protein] reductase	No	Yes
66	At1D1609_52250	CP026926	131181	132821	1641	1	edd	phosphogluconate dehydratase	No	Yes
110	At1D1609_52260	CP026926	132845	133909	1065	1	NA	aldo/keto reductase	No	Regulon
5291	At1D1609_54470	CP026927	197636	198358	723	-1	NA	AcvB	No	Yes
4218	At1D1609_54500	CP026927	202741	203178	438	-1	virK	VirK	Yes	Yes
4219	At1D1609_54510	CP026927	203450	204625	1176	-1	virH2	P-450 monooxygenase	Yes	Yes
5295	At1D1609_54560	CP026927	207841	208194	354	-1	NA	transposase	No	Yes
5296	At1D1609_54570	CP026927	208898	210763	1866	-1	NA	hypothetical protein	No	Yes
5297	At1D1609_54580	CP026927	210753	211097	345	-1	NA	hypothetical protein	No	Yes

## Sheet: C58_detail
Feature	Cluster	Locus_tag	Contig	Start	End	Length	strand	Gene	Product (CDS)/Sequence (Motif)	Known_vir_gene	VirG_motif	Motif_sequence	Similarity_to_consensus	Distance_to_CDS
CDS	986	Atu0946	AE007869	935237	936337	1101	-1	NA	dehydrogenase	No	No
CDS	1756	Atu1865	AE007869	1845156	1845392	237	-1	NA	hypothetical protein	No	Yes
Motif		Atu1865	AE007869	1845386	1845399	14	1					TTTGCATGGGAAAT	0.785714	7
Motif		Atu1865	AE007869	1845685	1845698	14	1					CTTACACAGGAAAT	0.785714	306
CDS	2607	Atu2782	AE007869	2787259	2787849	591	-1	NA	acetyltransferase	No	Regulon
CDS	2608	Atu2783	AE007869	2787846	2788478	633	-1	NA	acetyltransferase	No	Yes
Motif		Atu2783	AE007869	2788588	2788601	14	1					GCTGCATATGACGC	0.785714	123
CDS	40	Atu3578	AE007870	632366	633913	1548	-1	glpD	glycerol-3-phosphate dehydrogenase	No	Yes
Motif		Atu3578	AE007870	633987	634000	14	1					ATGTCAAAAGAAAA	0.785714	87
CDS	4052	Atu4728	AE007870	1891371	1893173	1803	1	exsA	ABC transporter, nucleotide binding/ATPase protein	No	No
CDS	17	Atu5381	AE007872	371016	374174	3159	-1	NA	AcrB/AcrD/AcrF family protein	No	Regulon
CDS	6360	Atu5382	AE007872	374200	375354	1155	-1	NA	HlyD family secretion protein	No	Yes
Motif		Atu5382	AE007872	375778	375791	14	1					ATTTCCACGGCAAC	0.785714	437
CDS	6361	Atu5383	AE007872	375414	376013	600	-1	NA	transcriptional regulator, TetR family	No	No
Motif		Atu6044	AE007871	53055	53068	14	1					ACATCAATGGTAAT	0.785714	523
Motif		Atu6044	AE007871	53176	53189	14	1					ATTTCATACGCTAT	0.857143	402
Motif		Atu6044	AE007871	53271	53284	14	1					CTTACAAATCCTAT	0.785714	307
CDS	4118	Atu6044	AE007871	53578	54690	1113	1	repB	replication protein	No	Yes
CDS	6084	Atu6098	AE007871	118471	118932	462	-1	NA	transcriptional regulator, HTH family	No	No
CDS	4229	Atu6109	AE007871	130449	131048	600	1	NA	conserved hypothetical protein	No	No
CDS	4156	Atu6120	AE007871	139472	139750	279	-1	hupT	HNS-type DNA binding protein	No	No
CDS	6090	Atu6121	AE007871	139890	140147	258	-1	ych	conserved hypothetical protein	No	No
CDS	6094	Atu6137	AE007871	156936	157232	297	-1	NA	hypothetical protein	No	Yes
Motif		Atu6137	AE007871	157350	157363	14	1					GTTTGTAATGTATT	0.785714	131
Motif		Atu6138	AE007871	157350	157363	14	1					GTTTGTAATGTATT	0.785714	114
CDS	6095	Atu6138	AE007871	157464	158240	777	1	accR	Repressor of the acc and arc operons	No	Yes
CDS	6103	Atu6149	AE007871	167545	167880	336	1	NA	hypothetical protein	No	Regulon
Motif		Atu6150	AE007871	167740	167753	14	1					ATTACAGATGAAAC	0.928571	143
CDS	6104	Atu6150	AE007871	167883	169142	1260	1	virH1	P-450 monooxygenase	Yes	Yes
Motif		Atu6151	AE007871	169001	169014	14	1					GATTGAATTGCAAG	0.785714	218
Motif		Atu6151	AE007871	169212	169225	14	1					ACTCCCAATGCAAT	0.785714	7
Motif		Atu6151	AE007871	169218	169231	14	1					AATGCAATTGGCAC	0.785714	1
CDS	4219	Atu6151	AE007871	169219	170394	1176	1	virH2	P-450 monoxygenase	Yes	Yes
CDS	107	Atu6152	AE007871	170670	171593	924	1	tnp	transposase	No	No
Motif		Atu6154	AE007871	172264	172277	14	1					GTGGCAATCGGAAT	0.785714	225
Motif		Atu6154	AE007871	172378	172391	14	1					AGGTCAATTGAATC	0.785714	111
Motif		Atu6154	AE007871	172403	172416	14	1					ATTGCAAAAGTAAT	0.928571	86
Motif		Atu6154	AE007871	172414	172427	14	1					AATACAATAAAAAT	0.785714	75
CDS	6106	Atu6154	AE007871	172489	173427	939	1	virF	exported virulence protein	Yes	Yes
Motif		Atu6155	AE007871	173296	173309	14	1					GGTCCAAATGCAGT	0.785714	582
Motif		Atu6155	AE007871	173603	173616	14	1					GTTTCAAATGAAGC	0.928571	275
Motif		Atu6155	AE007871	173852	173865	14	1					ATATCAATTGAGCC	0.785714	26
CDS	6107	Atu6155	AE007871	173878	174306	429	1	NA	conserved hypothetical protein	No	Yes
Motif		Atu6156	AE007871	173852	173865	14	1					ATATCAATTGAGCC	0.785714	476
Motif		Atu6156	AE007871	174114	174127	14	1					ACTTCATACCAAAC	0.785714	214
Motif		Atu6156	AE007871	174321	174334	14	1					ATCACCTATGAAAC	0.857143	7
CDS	4218	Atu6156	AE007871	174328	174762	435	1	virK	virA/G regulated gene	Yes	Yes
Motif		Atu6157	AE007871	174321	174334	14	1					ATCACCTATGAAAC	0.857143	485
Motif		Atu6157	AE007871	174421	174434	14	1					ATTGCGCTTGCACT	0.785714	385
CDS	6108	Atu6157	AE007871	174806	175120	315	1	NA	conserved hypothetical protein	No	Yes
Motif		Atu6160	AE007871	175705	175718	14	1					ATCTCAAATGTATC	0.857143	360
Motif		Atu6160	AE007871	175908	175921	14	1					AATCCATTGGAAAC	0.785714	157
CDS	6111	Atu6160	AE007871	176065	176244	180	1	ynh	conserved hypothetical protein	No	Yes
CDS	6113	Atu6162	AE007871	177407	178117	711	-1	NA	conserved hypothetical protein	No	Yes
Motif		Atu6162	AE007871	178486	178499	14	1					CTTGGAAATCCAAT	0.785714	382
CDS	6115	Atu6164	AE007871	179262	179993	732	-1	tzs	trans-zeatin secretion protein	No	Yes
Motif		Atu6164	AE007871	180117	180130	14	1					GCTACATTTGTAAT	0.928571	137
Motif		Atu6164	AE007871	180419	180432	14	1					GTCTCATATGCCGC	0.785714	439
Motif		Atu6165	AE007871	179831	179844	14	1					ATTGCAATTCCGAT	0.857143	448
Motif		Atu6165	AE007871	179920	179933	14	1					GTTTCTTGTGCGAT	0.785714	359
Motif		Atu6165	AE007871	180117	180130	14	1					GCTACATTTGTAAT	0.928571	162
CDS	6116	Atu6165	AE007871	180279	180470	192	1	NA	hypothetical protein	No	Yes
Motif		Atu6166	AE007871	180419	180432	14	1					GTCTCATATGCCGC	0.785714	412
Motif		Atu6166	AE007871	180595	180608	14	1					ATTTCATTTTTCTC	0.785714	236
Motif		Atu6166	AE007871	180712	180725	14	1					GTTTCATTTGAAAC	1	119
CDS	4217	Atu6166	AE007871	180831	183332	2502	1	virA	two component sensor kinase	Yes	Yes
Motif		Atu6167	AE007871	183743	183756	14	1					GCTTCAAATGAAAT	0.928571	134
CDS	4121	Atu6167	AE007871	183877	184614	738	1	virB1	component of type IV secretion system	Yes	Yes
CDS	4122	Atu6168	AE007871	184614	184979	366	1	virB2	component of type IV secretion system, pilin subunit	Yes	Regulon
CDS	4123	Atu6169	AE007871	184979	185305	327	1	virB3	component of type IV secretion system	Yes	Regulon
CDS	105	Atu6170	AE007871	185305	187674	2370	1	virB4	component of type IV secretion system	Yes	Regulon
CDS	4124	Atu6171	AE007871	187691	188353	663	1	virB5	component of type IV secretion system	Yes	Regulon
CDS	4125	Atu6172	AE007871	188454	189341	888	1	virB6	component of type IV secretion system	Yes	Regulon
Motif		Atu6173	AE007871	188844	188857	14	1					ATTGCATCTGAAAT	0.928571	533
CDS	4126	Atu6173	AE007871	189377	189544	168	1	virB7	component of type IV secretion system	Yes	Yes
CDS	4127	Atu6174	AE007871	189531	190244	714	1	virB8	component of type IV secretion system	Yes	Regulon
Motif		Atu6175	AE007871	189696	189709	14	1					TTCACAATTGCCAC	0.785714	545
CDS	4128	Atu6175	AE007871	190241	191122	882	1	virB9	component of type IV secretion system	Yes	Yes
Motif		Atu6176	AE007871	191022	191035	14	1					TATGCATTTGGAAT	0.785714	97
CDS	4129	Atu6176	AE007871	191119	192252	1134	1	virB10	component of type IV secretion system	Yes	Yes
Motif		Atu6177	AE007871	192249	192262	14	1					ATAACGAATTCAAC	0.785714	44
CDS	4130	Atu6177	AE007871	192293	193327	1035	1	virB11	component of type IV secretion system	Yes	Yes
CDS	4133	Atu6179	AE007871	194449	195057	609	-1	virC2	virA/G regulated protein	Yes	Yes
Motif		Atu6179	AE007871	195173	195186	14	1					ATGTGAGATGCAAC	0.785714	129
CDS	4134	Atu6180	AE007871	195060	195755	696	-1	virC1	virA/G regulated protein	Yes	Yes
Motif		Atu6180	AE007871	195826	195839	14	1					AATTCATAAGTAAT	0.857143	84
Motif		Atu6180	AE007871	195861	195874	14	1					ATTTCAATTTTATT	0.857143	119
Motif		Atu6180	AE007871	195866	195879	14	1					AATTTTATTGTAAT	0.785714	124
Motif		Atu6180	AE007871	195877	195890	14	1					AATATAATTTCAAT	0.785714	135
Motif		Atu6180	AE007871	195883	195896	14	1					ATTTCAATTGTAAT	1	141
Motif		Atu6181	AE007871	195826	195839	14	1					AATTCATAAGTAAT	0.857143	200
Motif		Atu6181	AE007871	195861	195874	14	1					ATTTCAATTTTATT	0.857143	165
Motif		Atu6181	AE007871	195866	195879	14	1					AATTTTATTGTAAT	0.785714	160
Motif		Atu6181	AE007871	195877	195890	14	1					AATATAATTTCAAT	0.785714	149
Motif		Atu6181	AE007871	195883	195896	14	1					ATTTCAATTGTAAT	1	143
CDS	4135	Atu6181	AE007871	196026	196469	444	1	virD1	virA/G regulated topoisomerase	Yes	Yes
CDS	4136	Atu6182	AE007871	196503	197846	1344	1	virD2	endonuclease	Yes	Regulon
Motif		Atu6183	AE007871	197331	197344	14	1					GTTGCATTGGAGAC	0.857143	530
CDS	6117	Atu6183	AE007871	197861	199882	2022	1	virD3	virA/G regulated protein	Yes	Yes
CDS	4137	Atu6184	AE007871	199956	201962	2007	1	virD4	virA/G regulated protein	Yes	Regulon
Motif		Atu6185	AE007871	201483	201496	14	1					GATAACAATGAAAT	0.785714	591
Motif		Atu6185	AE007871	201855	201868	14	1					GTTTCAGCTGAAAT	0.857143	219
CDS	4138	Atu6185	AE007871	202074	204596	2523	1	virD5	virA/G regulated protein	Yes	Yes
Motif		Atu6186	AE007871	204162	204175	14	1					GTTACCATGCCAAT	0.785714	504
Motif		Atu6186	AE007871	204347	204360	14	1					GTGTCAAGTGTATC	0.785714	319
Motif		Atu6186	AE007871	204513	204526	14	1					GTTGAATATACTAC	0.785714	153
CDS	6118	Atu6186	AE007871	204666	205232	567	1	virE3	virA/G regulated protein	Yes	Yes
Motif		Atu6188	AE007871	205556	205569	14	1					ATTACATATGAAAC	1	128
CDS	6119	Atu6188	AE007871	205684	205935	252	1	virE0	virA/G regulated protein	Yes	Yes
Motif		Atu6189	AE007871	205556	205569	14	1					ATTACATATGAAAC	1	495
CDS	4139	Atu6189	AE007871	206051	206242	192	1	virE1	protein secretion chaperone	Yes	Yes
CDS	4140	Atu6190	AE007871	206256	207926	1671	1	virE2	exported virulence protein	Yes	Regulon
Motif		Atu6191	AE007871	207970	207983	14	1					TATGCATTTGAAAG	0.785714	23
CDS	4141	Atu6191	AE007871	207993	210047	2055	1	virE3	virA/G regulated protein	Yes	Yes

## Sheet: 1D1609_detail
Feature	Cluster	Locus_tag	Contig	Start	End	Length	strand	Gene	Product	Known_vir_gene	VirG_motif	Motif_sequence	Similarity_to_consensus	Distance_to_CDS
CDS	273	At1D1609_01540	CP026924	177041	177946	906	-1	phnD	phosphonate transport system substrate-binding protein	No	Yes
Motif			CP026924	178245	178258	14	1					GATGCGTTCGCAAT	0.785714	312
CDS	274	At1D1609_01550	CP026924	178032	178892	861	-1	phnC	phosphonate transport system ATP-binding protein	No	Yes
Motif			CP026924	179125	179138	14	1					ATTTCATCCGCCAT	0.785714	246
Motif			CP026924	356464	356477	14	1					ATTGAAATCGCAAA	0.785714	297
CDS	405	At1D1609_03450	CP026924	356761	358059	1299	1	ugpB	sn-glycerol 3-phosphate transport system substrate-binding protein	No	Yes
CDS	1486	At1D1609_15720	CP026924	1577719	1578582	864	-1	fixP	cytochrome c oxidase, FixP chain	No	Regulon
CDS	1487	At1D1609_15730	CP026924	1578586	1578738	153	-1	fixQ	cytochrome c oxidase, FixQ chain	No	Yes
Motif			CP026924	1579268	1579281	14	1					GTGGCAGACGTAAC	0.785714	543
CDS	1488	At1D1609_15740	CP026924	1578752	1579483	732	-1	fixO	cytochrome c oxidase, FixO chain	No	No
CDS	4644	At1D1609_24190	CP026924	2436050	2436277	228	-1	NA	hypothetical protein	No	Yes
Motif			CP026924	2436349	2436362	14	1					AAAACCAATGAAAC	0.785714	85
CDS	3242	At1D1609_37320	CP026925	817472	819349	1878	1	NA	ABC transporter permease	No	No
CDS	3243	At1D1609_37330	CP026925	819416	820426	1011	1	NA	ABC transporter substrate-binding protein	No	No
CDS	3247	At1D1609_37370	CP026925	823359	824984	1626	1	NA	acyl-CoA synthetase	No	No
CDS	3248	At1D1609_37380	CP026925	825016	825783	768	1	fabG	3-oxoacyl-[acyl-carrier-protein] reductase	No	No
CDS	3316	At1D1609_38150	CP026925	909502	910347	846	-1	NA	hydrolase	No	No
CDS	3317	At1D1609_38160	CP026925	910359	910961	603	-1	NA	peptide synthetase	No	No
CDS	3521	At1D1609_41520	CP026925	1284686	1285606	921	-1	NA	gluconolactonase	No	Regulon
CDS	3522	At1D1609_41530	CP026925	1285642	1286589	948	-1	rbsC	ribose transport system permease protein	No	Regulon
CDS	3523	At1D1609_41540	CP026925	1286586	1287527	942	-1	rbsC	ribose transport system permease protein	No	Regulon
CDS	3524	At1D1609_41550	CP026925	1287524	1288987	1464	-1	rbsA	ribose transport system ATP-binding protein	No	Regulon
CDS	3525	At1D1609_41560	CP026925	1289086	1290102	1017	-1	rbsB	ribose transport system substrate-binding protein	No	Yes
Motif			CP026925	1290180	1290193	14	1					AATTCCTTTGCACT	0.785714	91
Motif			CP026925	1290566	1290579	14	1					ATGACAAATATCAC	0.785714	477
CDS	3801	At1D1609_45290	CP026925	1690198	1690485	288	1	napD	periplasmic nitrate reductase NapD	No	No
CDS	3803	At1D1609_45310	CP026925	1692961	1693425	465	1	napB	cytochrome c-type protein NapB	No	No
CDS	5054	At1D1609_49800	CP026925	2203407	2204213	807	-1	NA	hypothetical protein	No	Yes
Motif			CP026925	2204307	2204320	14	1					GATACGTTTGTAAA	0.785714	107
CDS	7	At1D1609_49820	CP026925	2205132	2208272	3141	-1	acrB	multidrug efflux pump	No	Yes
Motif			CP026925	2208427	2208440	14	1					GTGACAATCGTTAC	0.785714	168
Motif			CP026925	2208601	2208614	14	1					TTGGAAAATGAAAT	0.785714	342
CDS	5056	At1D1609_49830	CP026925	2208276	2209430	1155	-1	NA	hemolysin D	No	Yes
Motif			CP026925	2209504	2209517	14	1					ATTCCGAATGTAAA	0.785714	87
Motif			CP026926	2123	2136	14	1					GTTGCACTTGCAGA	0.785714	542
CDS	4119	At1D1609_51000	CP026926	2665	3984	1320	1	repC	replication protein C	No	Yes
Motif			CP026926	12677	12690	14	1					ATTTCGCTTGAACC	0.785714	368
Motif			CP026926	12913	12926	14	1					GCTTCAATTGAAAT	0.928571	132
Motif			CP026926	12933	12946	14	1					GAAGCAATTGAAAA	0.785714	112
CDS	4121	At1D1609_51060	CP026926	13045	13764	720	1	virB1	type IV secretion system lytic transglycosylase VirB1	Yes	Yes
CDS	4122	At1D1609_51070	CP026926	13779	14144	366	1	virB2	type IV secretion system protein VirB2	Yes	Regulon
CDS	4123	At1D1609_51075	CP026926	14144	14470	327	1	virB3	type IV secretion system protein VirB3	Yes	Regulon
CDS	105	At1D1609_51080	CP026926	14470	16839	2370	1	virB4	type IV secretion system protein VirB4	Yes	Regulon
Motif			CP026926	16647	16660	14	1					GTTTCTTCTTAAAC	0.785714	207
CDS	4124	At1D1609_51090	CP026926	16854	17516	663	1	virB5	type IV secretion system protein VirB5	Yes	Yes
CDS	4125	At1D1609_51100	CP026926	17613	18500	888	1	virB6	type IV secretion system protein VirB6	Yes	Regulon
Motif			CP026926	18003	18016	14	1					ATCGCATCCGAAAT	0.785714	531
Motif			CP026926	18111	18124	14	1					GTTGGAATTCTCAC	0.785714	423
CDS	4126	At1D1609_51110	CP026926	18534	18701	168	1	virB7	type IV secretion system protein VirB7	Yes	Yes
Motif			CP026926	18111	18124	14	1					GTTGGAATTCTCAC	0.785714	577
CDS	4127	At1D1609_51120	CP026926	18688	19401	714	1	virB8	type IV secretion system protein VirB8	Yes	Yes
Motif			CP026926	19177	19190	14	1					GCTTCAAATGATGT	0.785714	221
Motif			CP026926	19372	19385	14	1					GTTTCAAACGTAGG	0.785714	26
CDS	4128	At1D1609_51130	CP026926	19398	20279	882	1	virB9	type IV secretion system protein VirB9	Yes	Yes
CDS	4129	At1D1609_51140	CP026926	20276	21409	1134	1	virB10	type IV secretion system protein VirB10	Yes	Regulon
Motif			CP026926	21437	21450	14	1					GATACATTGTAAAT	0.785714	12
Motif			CP026926	21442	21455	14	1					ATTGTAAATGGAAG	0.785714	7
CDS	4130	At1D1609_51150	CP026926	21449	22480	1032	1	virB11	type IV secretion system protein VirB11	Yes	Yes
Motif			CP026926	22499	22512	14	1					GTTTCACTTGTAAC	0.928571	191
Motif			CP026926	22532	22545	14	1					CATAAAATTGAAAT	0.785714	158
CDS	4131	At1D1609_51160	CP026926	22690	23415	726	1	virG	two-component response regulator VirG	Yes	Yes
Motif			CP026926	22906	22919	14	1					ATTCCAATCATAAT	0.785714	568
Motif			CP026926	23420	23433	14	1					ATTGCATTTGCCTC	0.857143	54
CDS	5118	At1D1609_51170	CP026926	23474	23857	384	1	NA	hypothetical protein	No	Yes
CDS	8	At1D1609_51180	CP026926	23913	24236	324	-1	NA	transposase	No	No
CDS	5121	At1D1609_51280	CP026926	32733	32924	192	-1	NA	hypothetical protein	No	Regulon
CDS	5122	At1D1609_51290	CP026926	32875	33267	393	-1	NA	transposase	No	Yes
Motif			CP026926	33656	33669	14	1					AAATCATTTGTAGC	0.785714	402
CDS	4133	At1D1609_51300	CP026926	33393	34001	609	-1	virC2	crown gall tumor protein VirC2	Yes	Yes
Motif			CP026926	34117	34130	14	1					ATGTAAGATGCAAC	0.785714	129
CDS	4134	At1D1609_51310	CP026926	34004	34699	696	-1	virC1	crown gall tumor protein VirC1	Yes	Yes
Motif			CP026926	34729	34742	14	1					AGTGCATTTGTATT	0.857143	43
Motif			CP026926	34799	34812	14	1					TTTTTATTTCAAAT	0.785714	113
Motif			CP026926	34804	34817	14	1					ATTTCAAATTCGTT	0.785714	118
Motif			CP026926	34815	34828	14	1					GTTATAATTCAATT	0.785714	129
Motif			CP026926	34820	34833	14	1					AATTCAATTGCAAT	0.928571	134
Motif			CP026926	34826	34839	14	1					ATTGCAATTGTAGC	0.928571	140
Motif			CP026926	34835	34848	14	1					GTAGCAATTATATT	0.785714	149
Motif			CP026926	34875	34888	14	1					ATTTCATATCGAGT	0.785714	189
Motif			CP026926	34729	34742	14	1					AGTGCATTTGTATT	0.857143	239
Motif			CP026926	34799	34812	14	1					TTTTTATTTCAAAT	0.785714	169
Motif			CP026926	34804	34817	14	1					ATTTCAAATTCGTT	0.785714	164
Motif			CP026926	34815	34828	14	1					GTTATAATTCAATT	0.785714	153
Motif			CP026926	34820	34833	14	1					AATTCAATTGCAAT	0.928571	148
Motif			CP026926	34826	34839	14	1					ATTGCAATTGTAGC	0.928571	142
Motif			CP026926	34835	34848	14	1					GTAGCAATTATATT	0.785714	133
Motif			CP026926	34875	34888	14	1					ATTTCATATCGAGT	0.785714	93
CDS	4135	At1D1609_51320	CP026926	34968	35411	444	1	virD1	type IV secretion system T-DNA border endonuclease VirD1	Yes	Yes
Motif			CP026926	34875	34888	14	1					ATTTCATATCGAGT	0.785714	570
CDS	4136	At1D1609_51330	CP026926	35445	36719	1275	1	virD2	type IV secretion system T-DNA border endonuclease VirD2	Yes	Yes
CDS	5123	At1D1609_51340	CP026926	36739	37344	606	1	virD3	virA/G regulated protein	Yes	Regulon
Motif			CP026926	37287	37300	14	1					GTTGCGAAAGATAC	0.785714	86
CDS	4137	At1D1609_51350	CP026926	37373	39343	1971	1	virD4	type IV secretion system protein VirD4	Yes	Yes
CDS	4138	At1D1609_51360	CP026926	39435	41936	2502	1	virD5	virA/G regulated protein	Yes	Regulon
Motif			CP026926	42129	42142	14	1					ATTGCAGTTGAAAC	0.928571	260
CDS	4139	At1D1609_51370	CP026926	42389	42586	198	1	virE1	type IV secretion system chaperone VirE1	Yes	Yes
Motif			CP026926	42129	42142	14	1					ATTGCAGTTGAAAC	0.928571	462
CDS	4140	At1D1609_51380	CP026926	42591	44192	1602	1	virE2	type IV secretion system single-stranded DNA binding protein VirE2	Yes	Yes
Motif			CP026926	44235	44248	14	1					TTTGCCAATGAAAG	0.785714	23
CDS	4141	At1D1609_51390	CP026926	44258	46276	2019	1	virE3	virA/G regulated protein	Yes	Yes
Motif			CP026926	46003	46016	14	1					ATCGCATTTGGTAC	0.785714	521
Motif			CP026926	46412	46425	14	1					ATTTCAGATTTAGC	0.785714	112
CDS	5124	At1D1609_51400	CP026926	46524	46718	195	1	NA	hypothetical protein	No	Yes
Motif			CP026926	46412	46425	14	1					ATTTCAGATTTAGC	0.785714	476
CDS	5125	At1D1609_51410	CP026926	46888	47196	309	1	NA	integration host factor beta subunit	No	Yes
CDS	5126	At1D1609_51420	CP026926	47247	47612	366	1	NA	hypothetical protein	No	Regulon
CDS	5127	At1D1609_51430	CP026926	47626	47928	303	1	cspA	cold shock protein	No	Regulon
CDS	4142	At1D1609_51440	CP026926	48251	48751	501	1	NA	amino acid transporter	No	No
Motif			CP026926	51408	51421	14	1					ACTACAAATGAAAC	0.928571	80
Motif			CP026926	51483	51496	14	1					ATATCATGAGAAAT	0.785714	5
CDS	5129	At1D1609_51490	CP026926	51488	52096	609	1	NA	VirF	No	Yes
CDS	5130	At1D1609_51500	CP026926	52789	53031	243	1	NA	hypothetical protein	No	No
Motif			CP026926	53167	53180	14	1					ATTGCACATCAATT	0.785714	512
Motif			CP026926	53252	53265	14	1					GTTTCACCTGTAAC	0.857143	427
Motif			CP026926	53365	53378	14	1					GTTGTAATTGAATT	0.857143	314
Motif			CP026926	53442	53455	14	1					GTTACTGTTGAAAC	0.857143	237
Motif			CP026926	53537	53550	14	1					ATGTTATTTTAAAT	0.785714	142
Motif			CP026926	53542	53555	14	1					ATTTTAAATAAATC	0.785714	137
CDS	5131	At1D1609_51510	CP026926	53679	54311	633	1	gph	phosphoglycolate phosphatase	No	Yes
Motif			CP026926	54279	54292	14	1					ATTGAAGATTTAAT	0.785714	112
CDS	5132	At1D1609_51520	CP026926	54391	54603	213	1	NA	hypothetical protein	No	Yes
Motif			CP026926	54460	54473	14	1					CCTGTATATGAAAT	0.785714	517
Motif			CP026926	54901	54914	14	1					ATGACAATTGAAAT	0.928571	76
Motif			CP026926	54906	54919	14	1					AATTGAAATGAAAT	0.857143	71
CDS	5133	At1D1609_51530	CP026926	54977	55504	528	1	NA	VirH	No	Yes
CDS	5136	At1D1609_51580	CP026926	59896	60021	126	-1	NA	hypothetical protein	No	No
CDS	5143	At1D1609_51770	CP026926	87053	87154	102	-1	NA	hypothetical protein	No	Yes
Motif			CP026926	87408	87421	14	1					ATTTCTCTCGAAAT	0.785714	267
CDS	4156	At1D1609_51790	CP026926	87612	87890	279	-1	hupT	HNS-type DNA binding protein	No	Yes
Motif			CP026926	88368	88381	14	1					ATTTCAAATGAAAG	0.928571	491
CDS	5160	At1D1609_52200	CP026926	126890	127708	819	-1	NA	hypothetical protein	No	Yes
Motif			CP026926	127730	127743	14	1					TTTGAACATGTAAC	0.785714	35
Motif			CP026926	127992	128005	14	1					ACTTCAAATGCACC	0.857143	297
CDS	5161	At1D1609_52210	CP026926	127718	128740	1023	-1	frlB	fructoselysine 6-phosphate deglycase	No	Yes
Motif			CP026926	128759	128772	14	1					GTTGAATTTGTGAG	0.785714	32
Motif			CP026926	130221	130234	14	1					GATATAAATGAAAC	0.857143	7
CDS	5162	At1D1609_52230	CP026926	130228	130974	747	1	fabG	3-oxoacyl-[acyl-carrier-protein] reductase	No	Yes
Motif			CP026926	130663	130676	14	1					GTTGCTTCTGCAAA	0.785714	518
CDS	66	At1D1609_52250	CP026926	131181	132821	1641	1	edd	phosphogluconate dehydratase	No	Yes
CDS	110	At1D1609_52260	CP026926	132845	133909	1065	1	NA	aldo/keto reductase	No	Regulon
CDS	5291	At1D1609_54470	CP026927	197636	198358	723	-1	NA	AcvB	No	Yes
Motif			CP026927	198435	198448	14	1					GTTACAAAAGACAC	0.857143	90
CDS	4218	At1D1609_54500	CP026927	202741	203178	438	-1	virK	VirK	Yes	Yes
Motif			CP026927	203172	203185	14	1					GTTTCATAAGCGAC	0.857143	7
Motif			CP026927	203317	203330	14	1					AATTGATTTGAGAT	0.785714	152
CDS	4219	At1D1609_54510	CP026927	203450	204625	1176	-1	virH2	P-450 monooxygenase	Yes	Yes
Motif			CP026927	204619	204632	14	1					ATAGCATTGGAAAT	0.857143	7
Motif			CP026927	204822	204835	14	1					CTTGCAATTCAATT	0.785714	210
CDS	5295	At1D1609_54560	CP026927	207841	208194	354	-1	NA	transposase	No	Yes
Motif			CP026927	208215	208228	14	1					ATCAGAATGGAAAC	0.785714	34
CDS	5296	At1D1609_54570	CP026927	208898	210763	1866	-1	NA	hypothetical protein	No	Yes
Motif			CP026927	211176	211189	14	1					GTTACGTTTGCAAT	0.928571	426
CDS	5297	At1D1609_54580	CP026927	210753	211097	345	-1	NA	hypothetical protein	No	Yes
Motif			CP026927	211176	211189	14	1					GTTACGTTTGCAAT	0.928571	92
